# Supplementary material for: Determining the effects of trastuzumab, cetuximab and afatinib by phosphoprotein, gene expression and phenotypic analysis in gastric cancer cell lines
Source: PubMed Central journal article supplement (PMC7594334; doi:10.1186/s12885-020-07540-7), 2020-10-28
Supplement: 12885_2020_7540_MOESM2_ESM.pdf [file 12885_2020_7540_MOESM2_ESM.pdf]

Figure S1

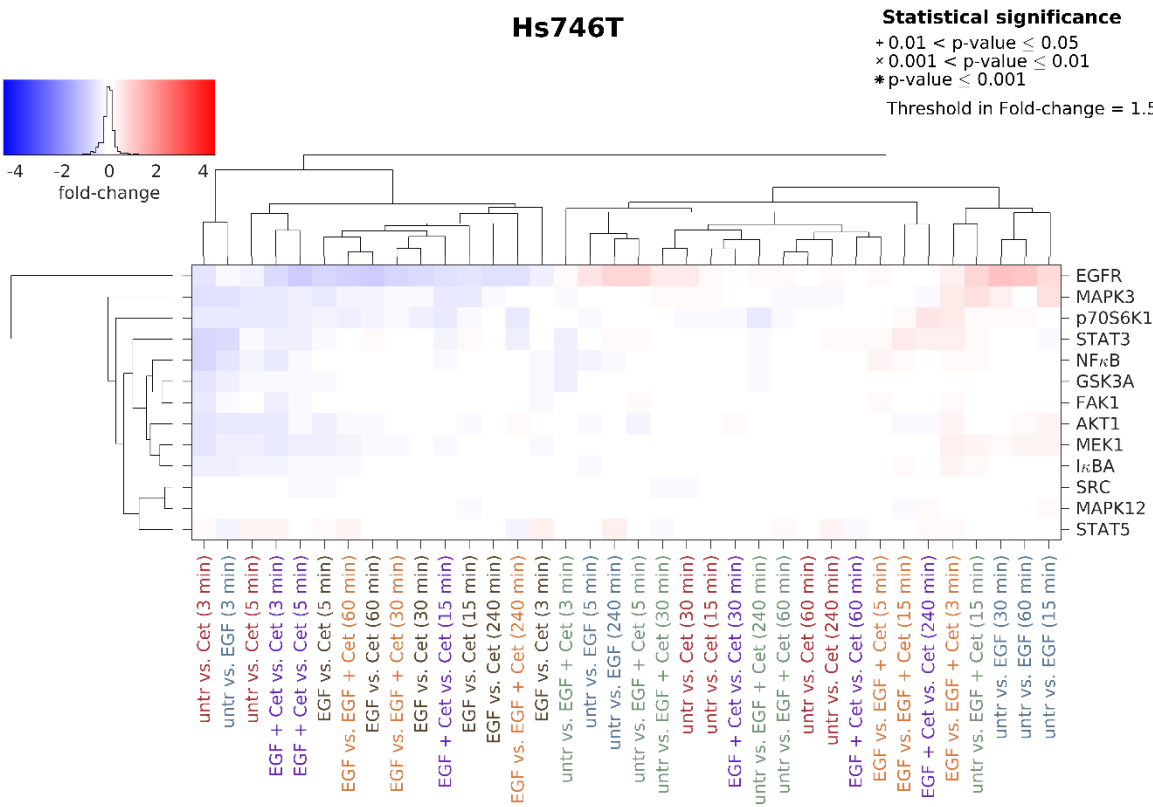

**Figure S1. Effects of EGF and cetuximab on kinase phosphorylation in Hs746T cells.**  
 Luminex analysis was performed to detect the effects on protein tyrosine kinases in Hs746T cells induced by EGF and/or cetuximab. Cells were treated for 3, 5, 15, 30, 60 and 240 minutes with 5 ng/ml EGF, 1 µg/ml cetuximab or the combination of both. In the batch-corrected cluster analysis, the x-fold change of each activated protein is shown. Samples were clustered based on to the similarity of the activated proteins and treatment conditions. Significant effects between different treatment conditions are indicated by (\*) with increasing size (0.01 < p-value ≤ 0.05, 0.001 < p-value ≤ 0.01 and p-value ≤ 0.001). Increasing protein phosphorylation/activation is indicated in red. Blue indicates decreasing protein phosphorylation/activation. Abbreviations: Cet = cetuximab, untr = untreated.

Figure S2

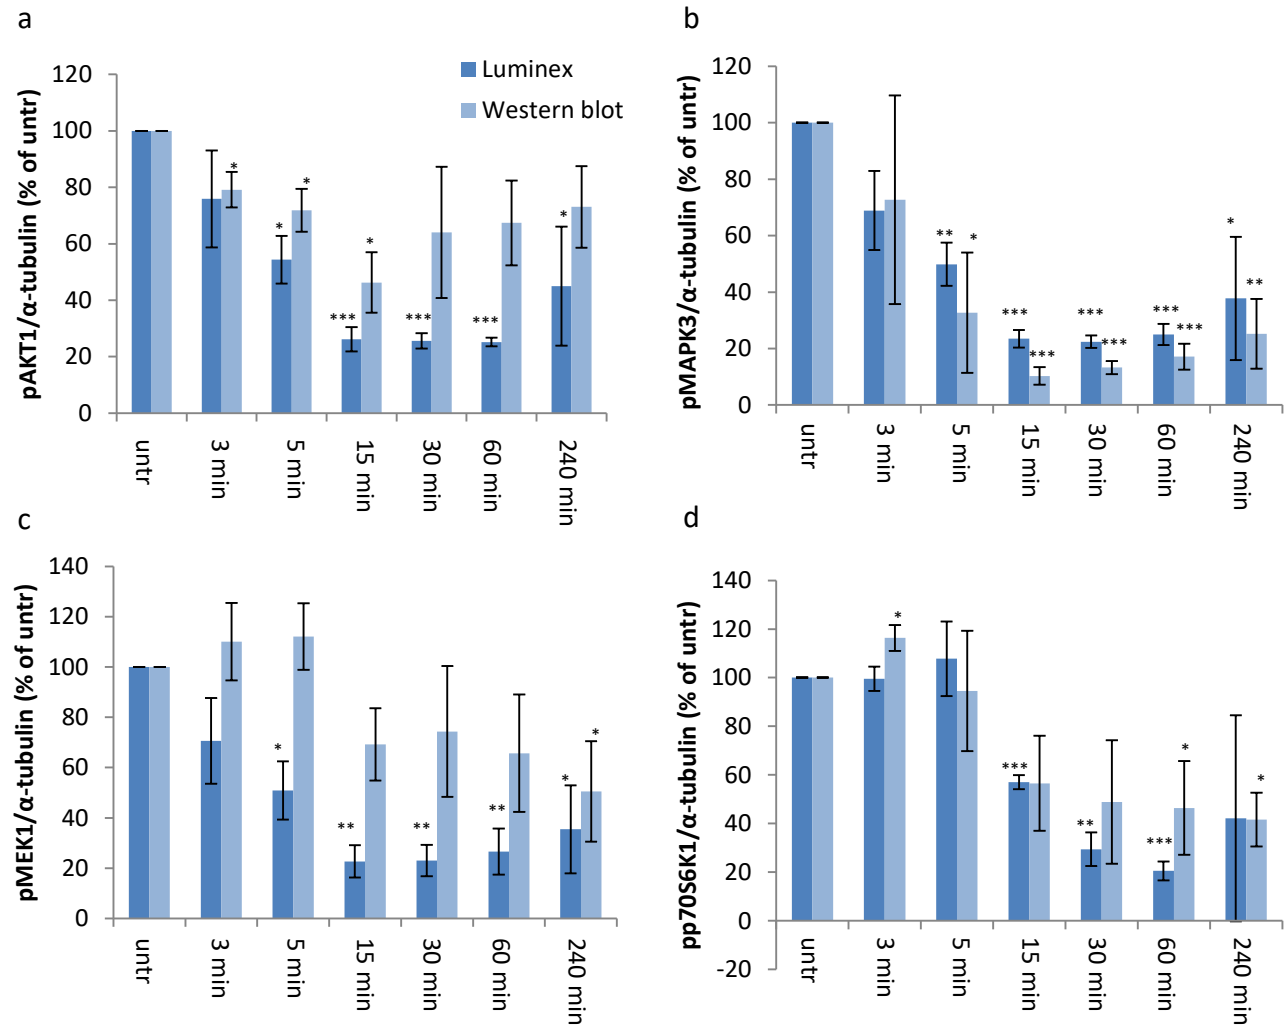

**Figure S2: Validation of the Luminex analysis by Western blot.**

The levels of activated tyrosine kinases pAKT1 (a), pMAPK3 (b), pMEK1 (c), pp70S6K1(d) were determined in NCI-N87 cells treated for 3, 5, 15, 30, 60 and 240 min with 0.5  $\mu$ M afatinib (Afa). The mean values with standard deviation of three independent experiments are shown. Statistically significant effects compared to untreated are indicated by \* $p < 0.05$ , \*\* $p < 0.01$  or \*\*\* $p < 0.001$  (one-sample t-test).

Figure S3

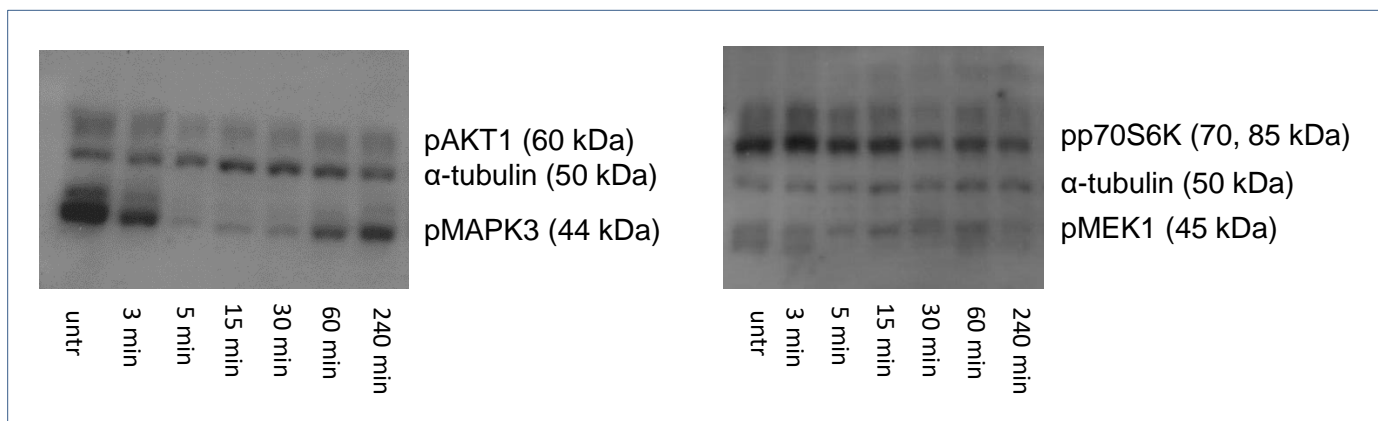

**Figure S3: Western blot images for Luminex validation.**

The levels of activated tyrosine kinases were determined in NCI-N87 cells treated for 3, 5, 15, 30, 60 and 240 min with 0.5  $\mu$ M afatinib (Afa). The results of one representative experiment are shown. Full-length blots are presented in Additional file 6.

Figure S4

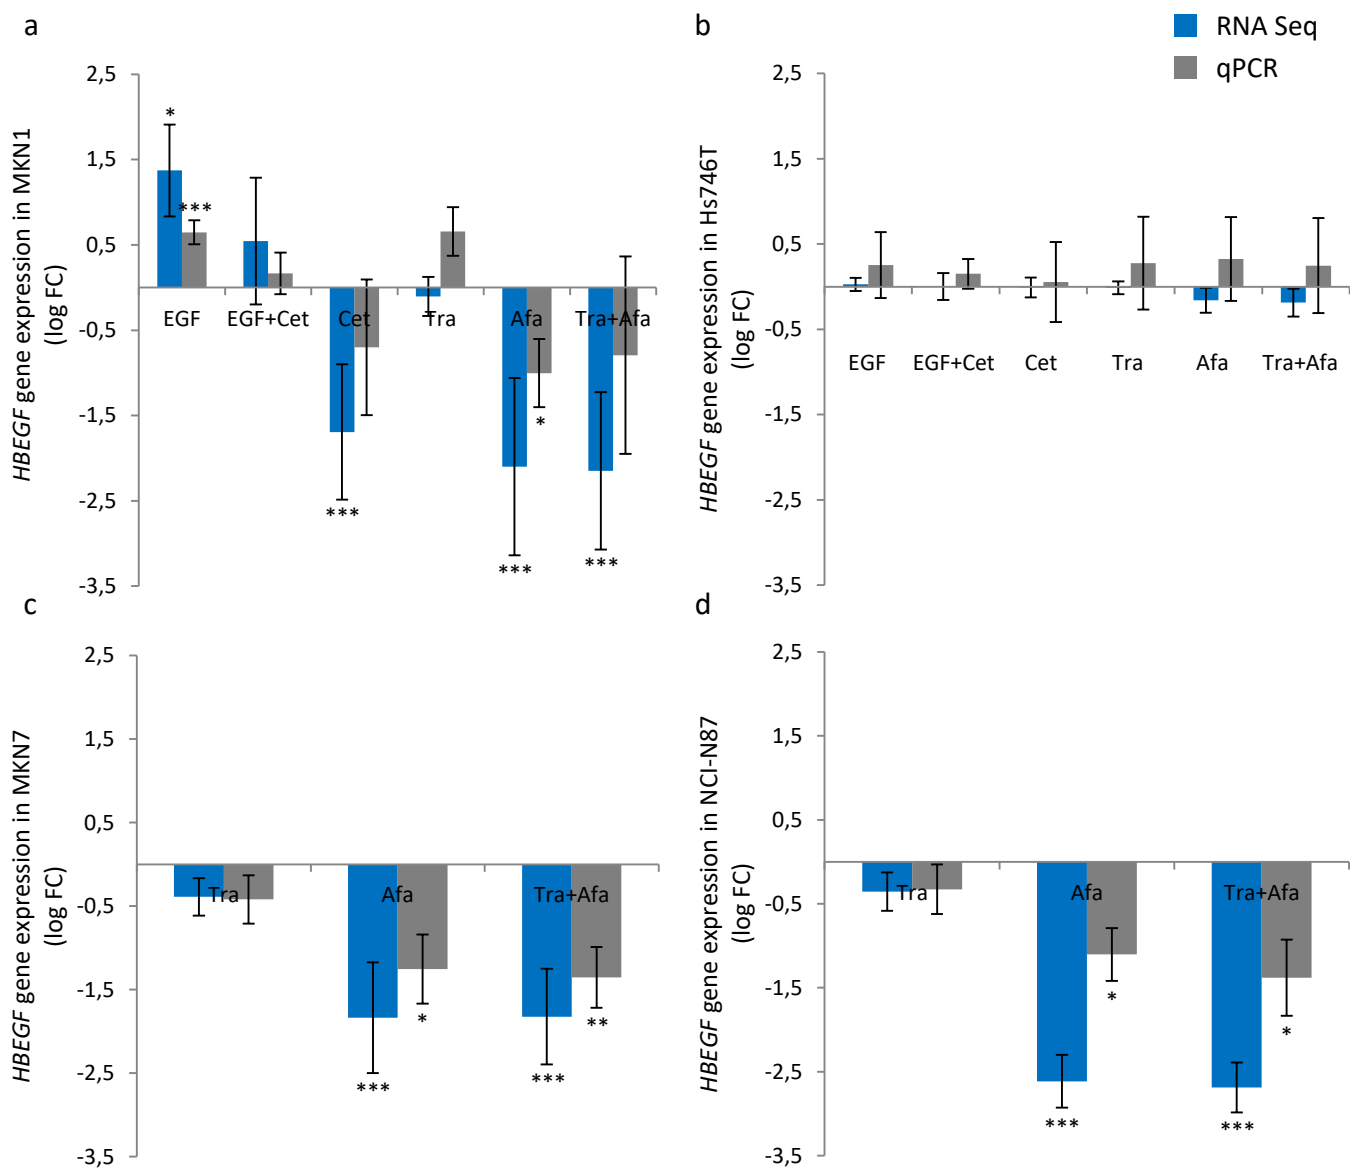

**Figure S4: HBEGF gene expression measured by RNA Sequencing and qPCR.** MKN1 (a) and Hs746T (b) cells were treated with EGF, EGF + cetuximab (EGF+Cet), cetuximab (Cet), trastuzumab (Tra), afatinib (Afa) or trastuzumab + afatinib (Tra+Afa) for 24 h. MKN7 (c) and NCI-N87 (d) were treated with trastuzumab (Tra), afatinib (Afa) or trastuzumab + afatinib (Tra+Afa) for 24 h. HBEGF gene expression was measured by RNA Sequencing and qPCR. The mean of three biological experiments with standard deviation is shown. Statistically significant effects compared to untreated are indicated by \*p<0.05, \*\*p<0.01 or \*\*\*p<0.001 (one-sample t-test).

Figure S5

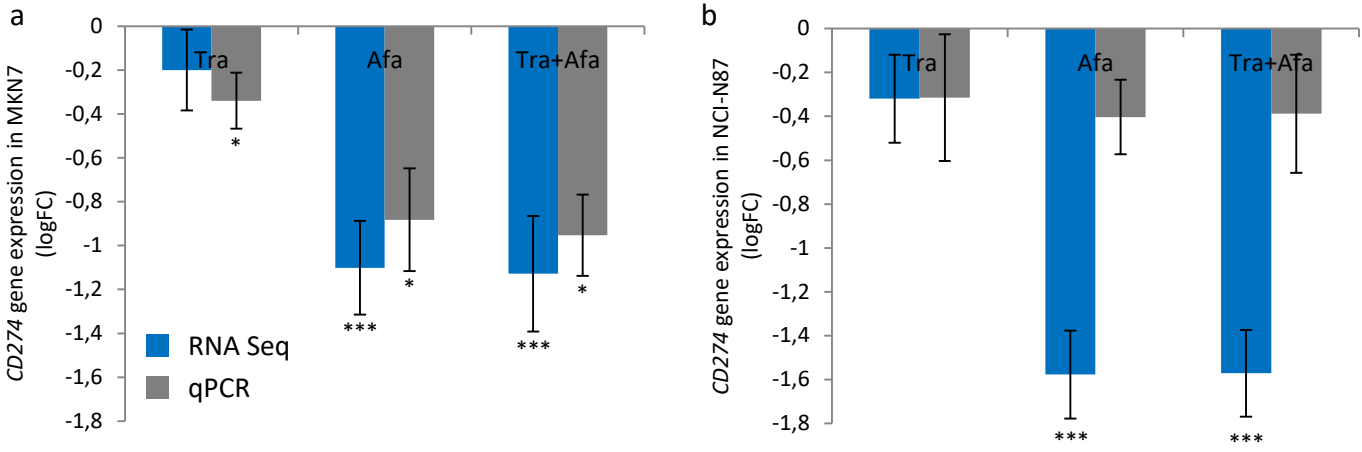

**Figure S5: CD274 gene expression measured by RNA Sequencing and qPCR.** MKN7 (a) and NCI-N87 (b) were treated with trastuzumab (Tra), afatinib (Afa) or trastuzumab + afatinib (Tra+Afa) for 24 h. CD274 gene expression was measured by RNA Sequencing and qPCR. The mean of three biological experiments with standard deviation is shown. Statistically significant effects compared to untreated are indicated by \*p<0.05 or \*\*\*p<0.001 (one-sample t-test).

Figure S6

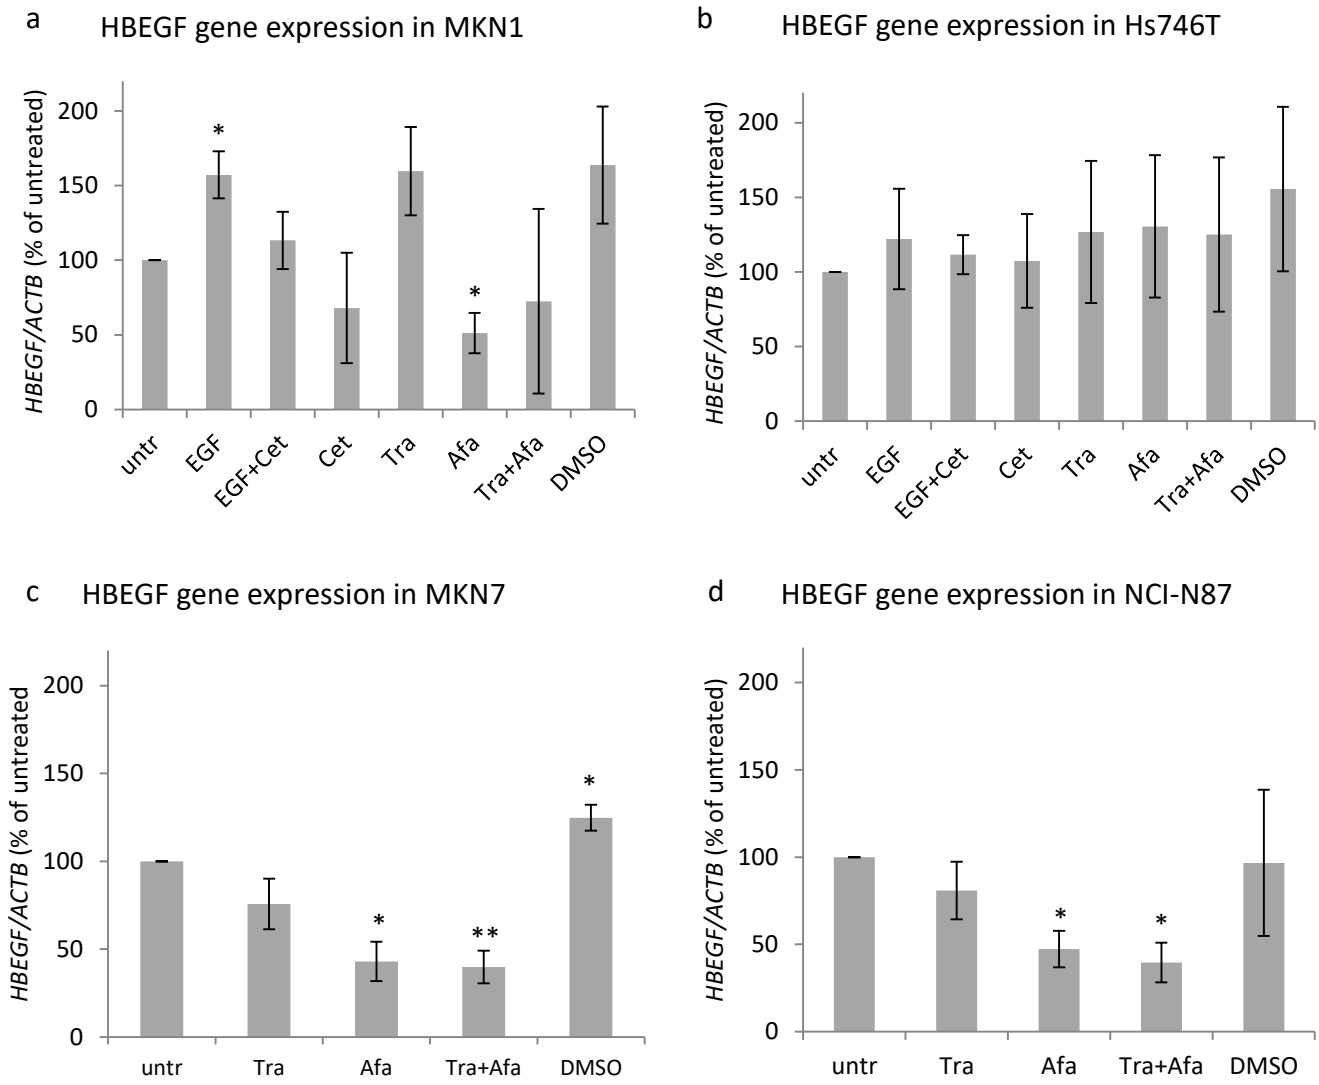

**Figure S6: HBEGF gene expression measured by qPCR.** MKN1 (a) and Hs746T (b) cells were treated with EGF, EGF + cetuximab (EGF+Cet), cetuximab (Cet), trastuzumab (Tra), afatinib (Afa), trastuzumab + afatinib (Tra+Afa) or DMSO for 24 h. MKN7 (c) and NCI-N87 (d) were treated with trastuzumab (Tra), afatinib (Afa), trastuzumab + afatinib (Tra+Afa) or DMSO for 24 h. HBEGF gene expression was measured by qPCR. The mean of three biological experiments with standard deviation is shown. Statistically significant effects compared to untreated are indicated by \*p<0.05 or \*\*p<0.01 (one-sample t-test).

Figure S7

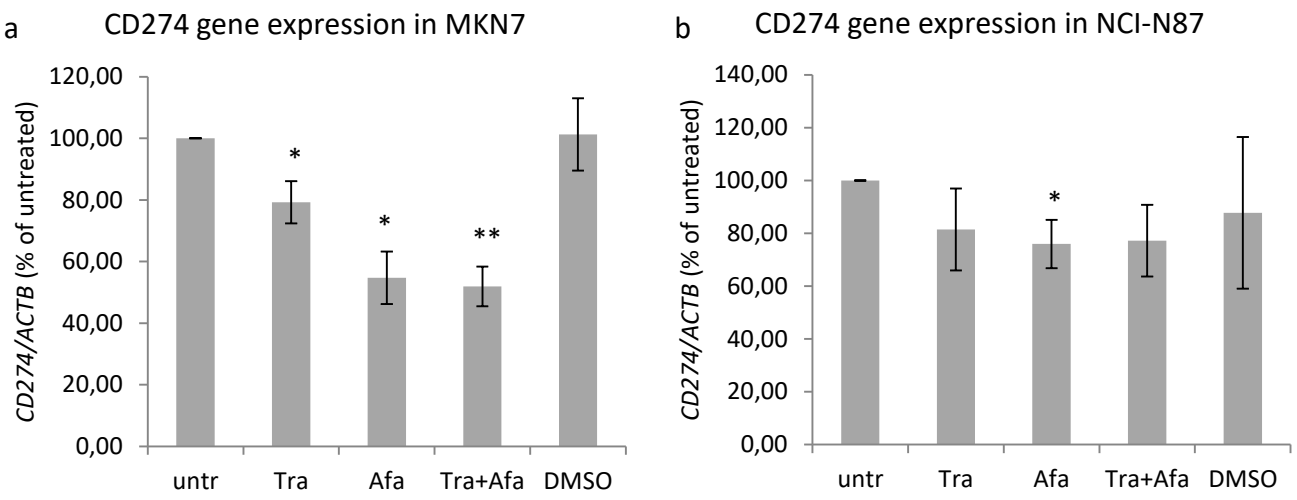

**Figure S7: CD274 gene expression measured by qPCR.** MKN7 (a) and NCI-N87 (b) were treated with trastuzumab (Tra), afatinib (Afa), trastuzumab + afatinib (Tra+Afa) or DMSO for 24 h. *CD274* gene expression was measured by qPCR. The mean of three biological experiments with standard deviation is shown. Statistically significant effects compared to untreated are indicated by \* $p < 0.05$  or \*\* $p < 0.01$  (one-sample t-test).

Figure S8

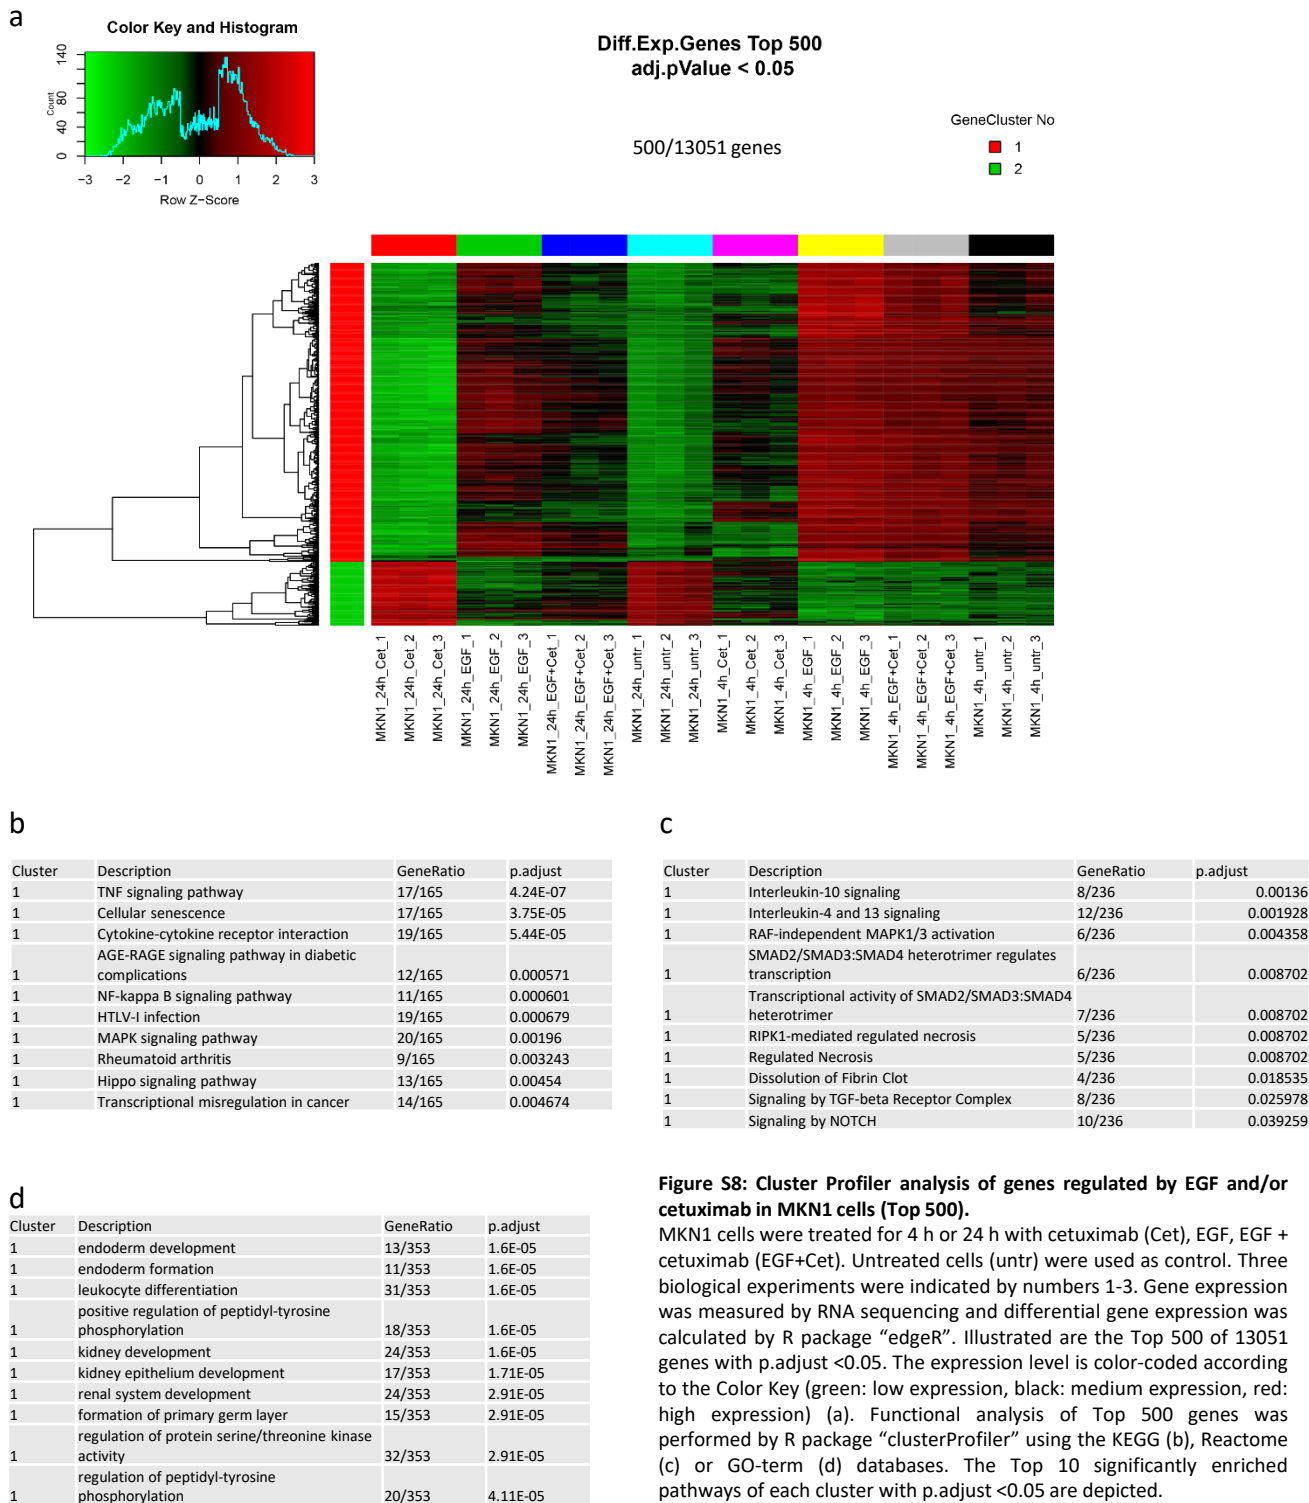

**Figure S8: Cluster Profiler analysis of genes regulated by EGF and/or cetuximab in MKN1 cells (Top 500).**

MKN1 cells were treated for 4 h or 24 h with cetuximab (Cet), EGF, EGF + cetuximab (EGF+Cet). Untreated cells (untr) were used as control. Three biological experiments were indicated by numbers 1-3. Gene expression was measured by RNA sequencing and differential gene expression was calculated by R package "edgeR". Illustrated are the Top 500 of 13051 genes with p.adjust < 0.05. The expression level is color-coded according to the Color Key (green: low expression, black: medium expression, red: high expression) (a). Functional analysis of Top 500 genes was performed by R package "clusterProfiler" using the KEGG (b), Reactome (c) or GO-term (d) databases. The Top 10 significantly enriched pathways of each cluster with p.adjust < 0.05 are depicted.



Figure S9

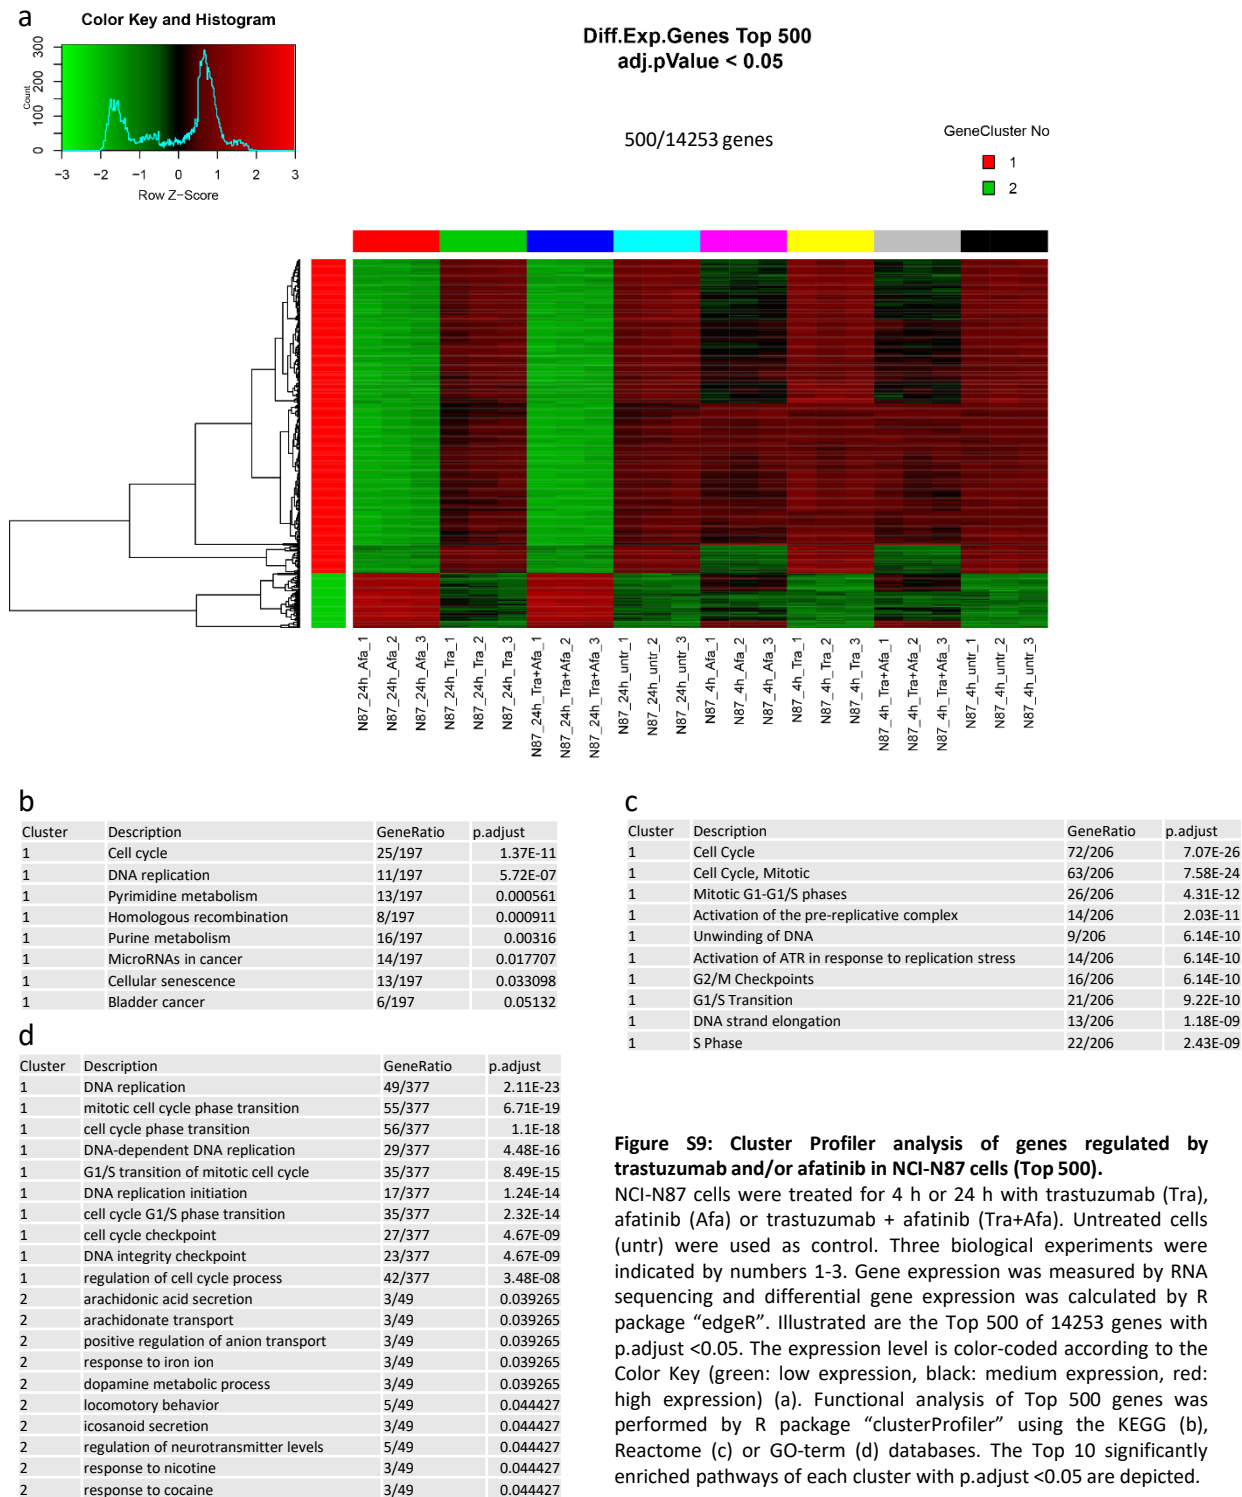

**Figure S9: Cluster Profiler analysis of genes regulated by trastuzumab and/or afatinib in NCI-N87 cells (Top 500).**

NCI-N87 cells were treated for 4 h or 24 h with trastuzumab (Tra), afatinib (Afa) or trastuzumab + afatinib (Tra+Afa). Untreated cells (untr) were used as control. Three biological experiments were indicated by numbers 1-3. Gene expression was measured by RNA sequencing and differential gene expression was calculated by R package "edgeR". Illustrated are the Top 500 of 14253 genes with p.adjust < 0.05. The expression level is color-coded according to the Color Key (green: low expression, black: medium expression, red: high expression) (a). Functional analysis of Top 500 genes was performed by R package "clusterProfiler" using the KEGG (b), Reactome (c) or GO-term (d) databases. The Top 10 significantly enriched pathways of each cluster with p.adjust < 0.05 are depicted.

Figure S10

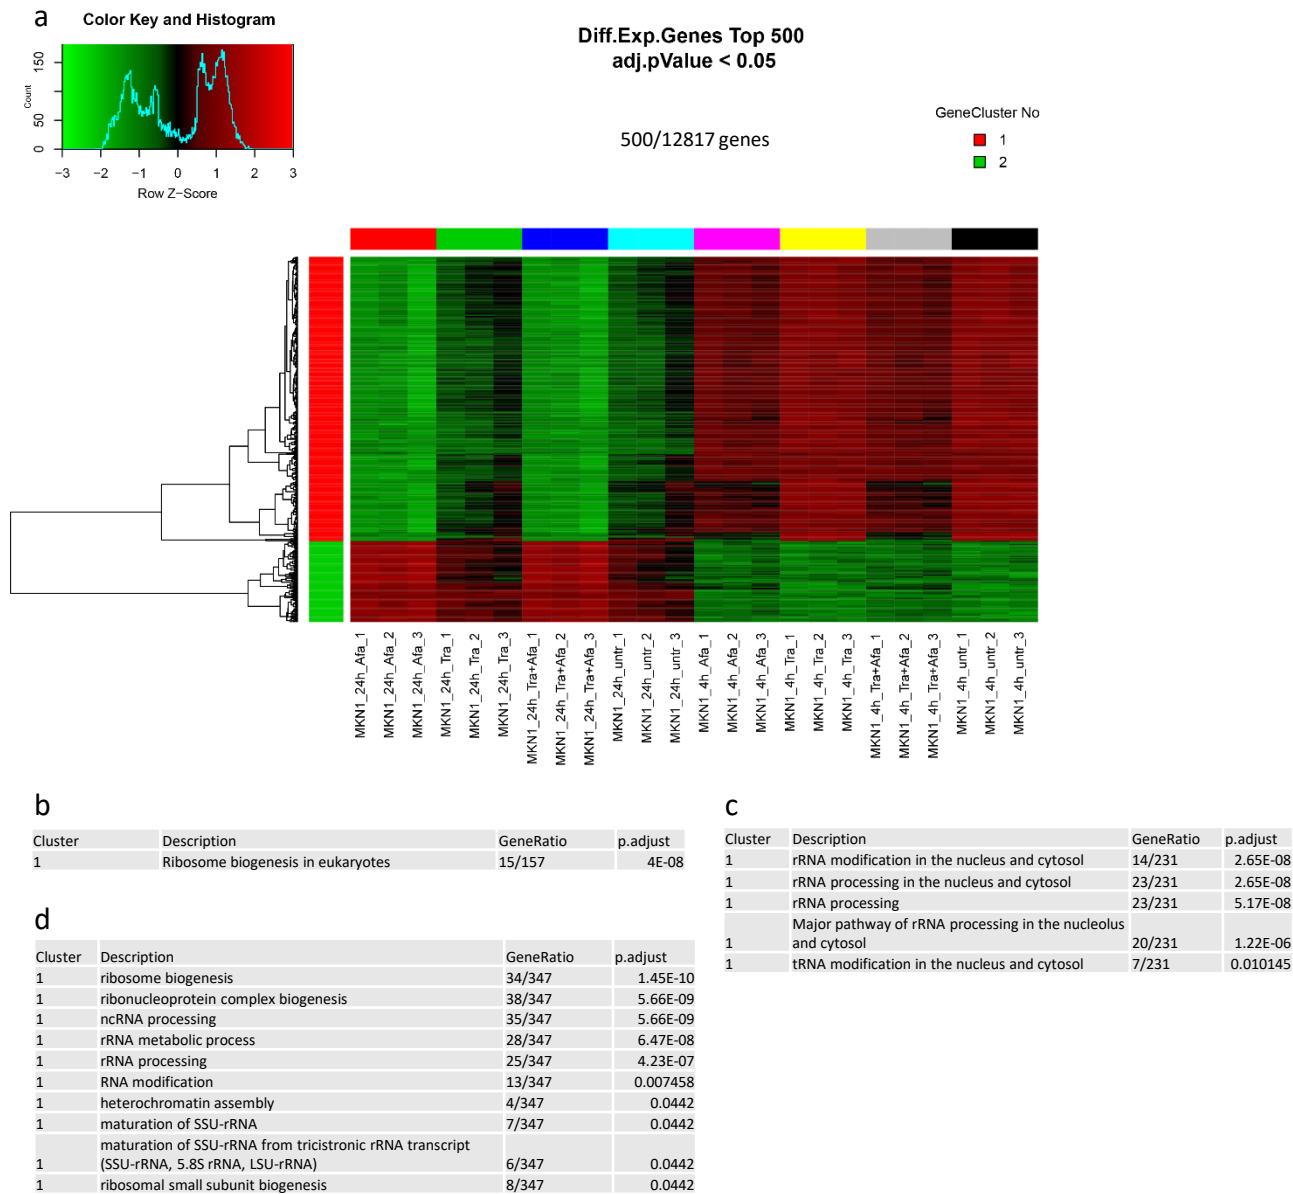

**Figure S10: Cluster Profiler analysis of genes regulated by trastuzumab and/or afatinib in MKN1 cells (Top 500).**

MKN1 cells were treated for 4 h or 24 h with trastuzumab (Tra), afatinib (Afa) or trastuzumab + afatinib (Tra+Afa). Untreated cells (untr) were used as control. Three biological experiments were indicated by numbers 1-3. Gene expression was measured by RNA sequencing and differential gene expression was calculated by R package “edgeR”. Illustrated are the Top 500 of 12817 genes with p.adjust < 0.05. The expression level is color-coded according to the Color Key (green: low expression, black: medium expression, red: high expression) (a). Functional analysis of Top 500 genes was performed by R package “clusterProfiler” using the KEGG (b), Reactome (c) or GO-term (d) databases. The Top 10 significantly enriched pathways of each cluster with p.adjust < 0.05 are depicted.

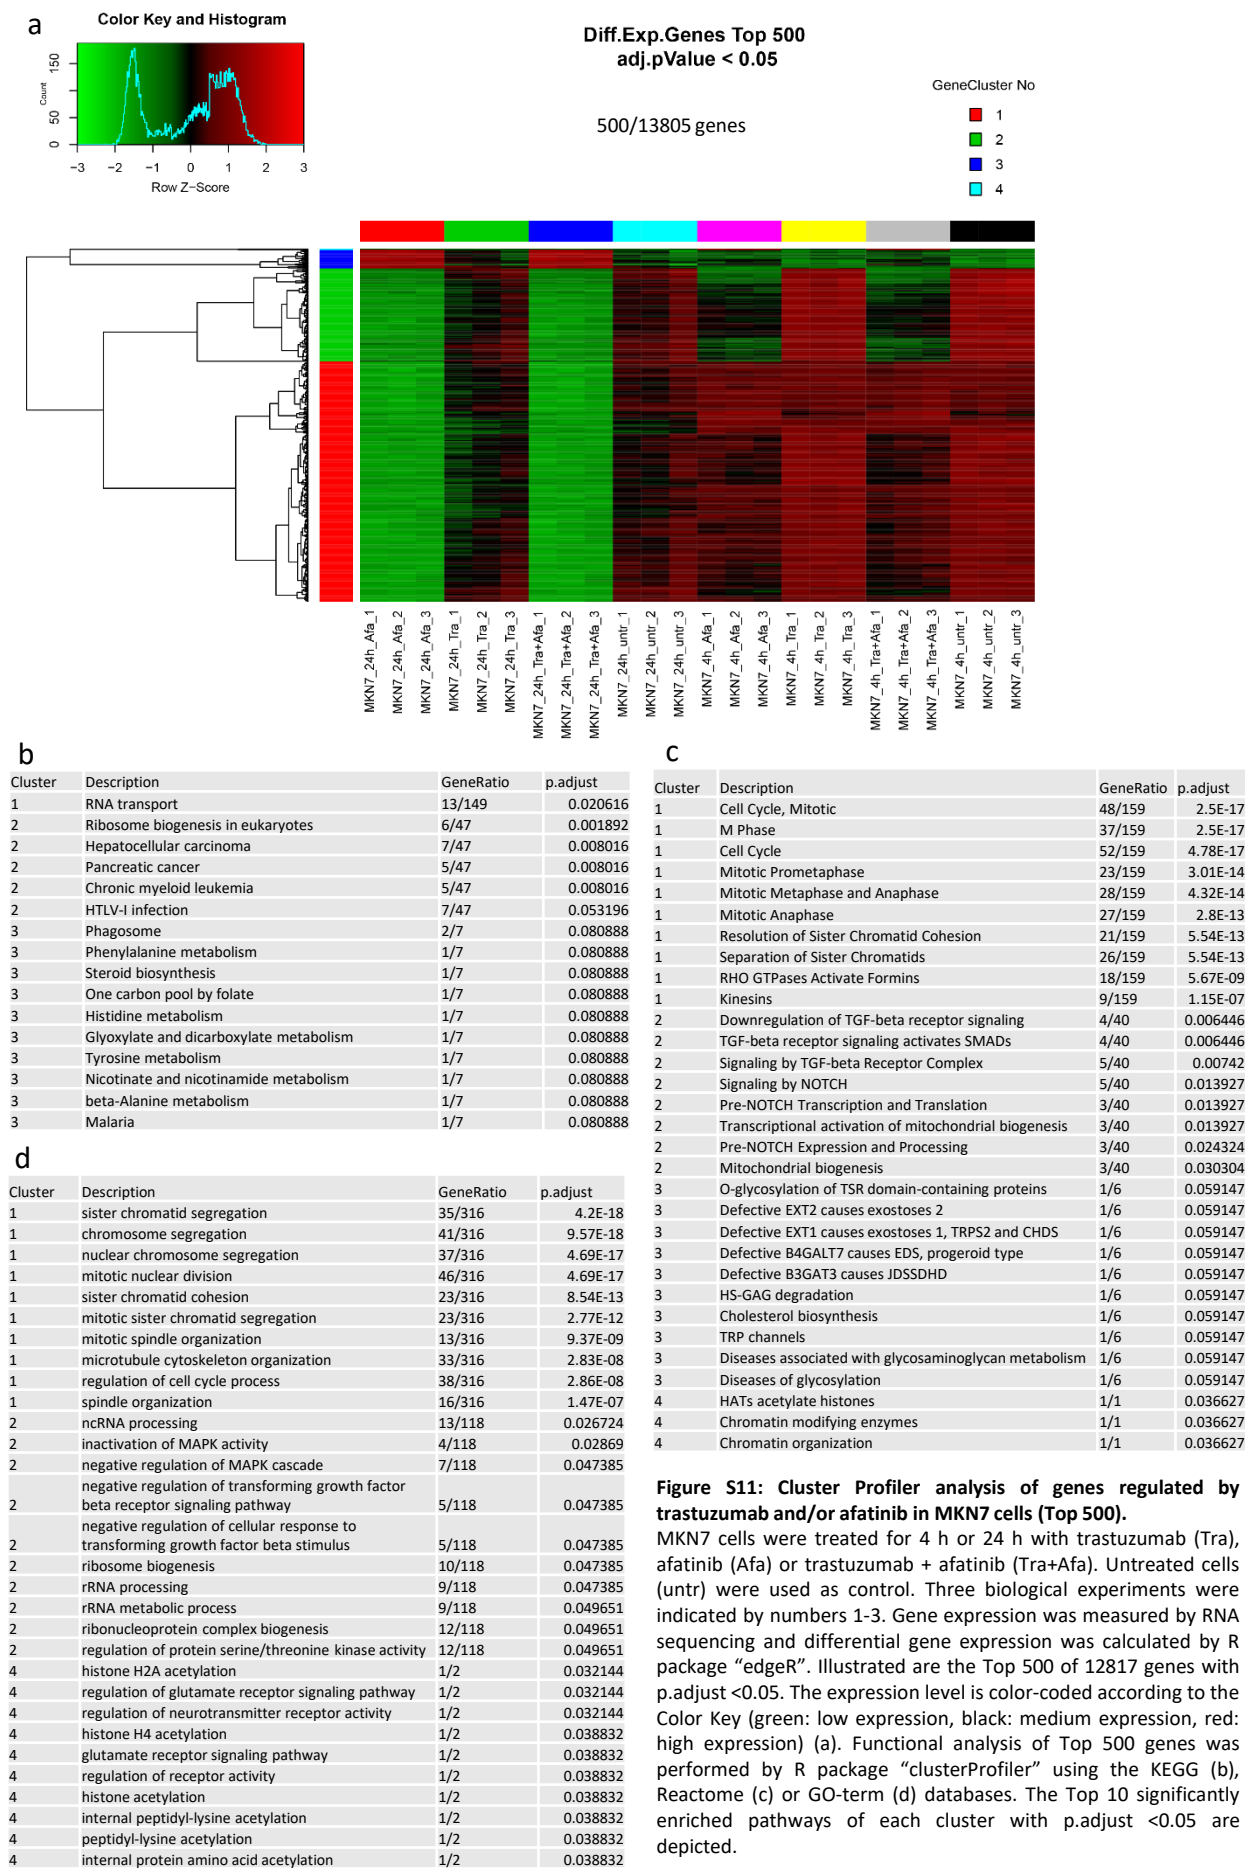

**Figure S11: Cluster Profiler analysis of genes regulated by trastuzumab and/or afatinib in MKN7 cells (Top 500).**

MKN7 cells were treated for 4 h or 24 h with trastuzumab (Tra), afatinib (Afa) or trastuzumab + afatinib (Tra+Afa). Untreated cells (untr) were used as control. Three biological experiments were indicated by numbers 1-3. Gene expression was measured by RNA sequencing and differential gene expression was calculated by R package “edgeR”. Illustrated are the Top 500 of 12817 genes with  $p.adjust < 0.05$ . The expression level is color-coded according to the Color Key (green: low expression, black: medium expression, red: high expression) (a). Functional analysis of Top 500 genes was performed by R package “clusterProfiler” using the KEGG (b), Reactome (c) or GO-term (d) databases. The Top 10 significantly enriched pathways of each cluster with  $p.adjust < 0.05$  are depicted.

Figure S12

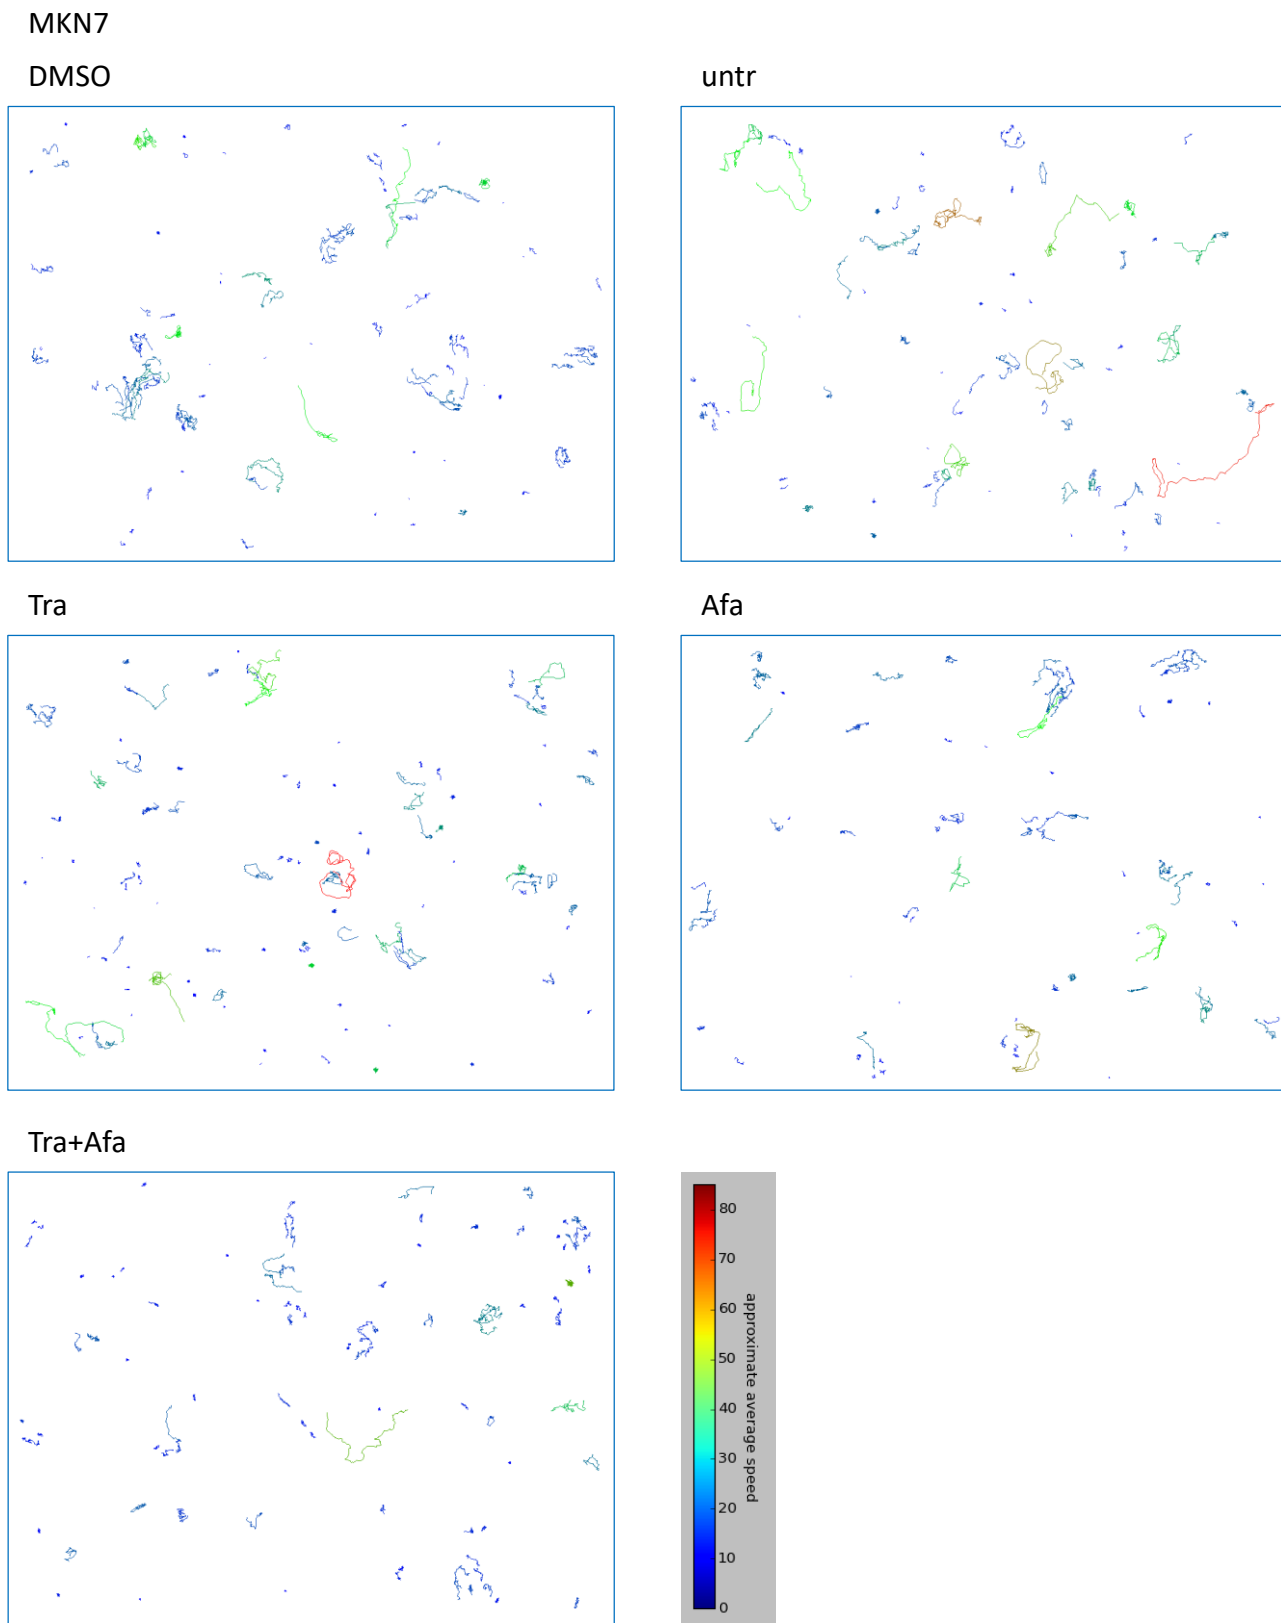

**Figure S12: Trajectories of MKN7 cells treated with trastuzumab or afatinib.**

MKN7 cells were treated with 5  $\mu\text{g/ml}$  trastuzumab (Tra), 0.5  $\mu\text{M}$  afatinib (Afa), 5  $\mu\text{g/ml}$  trastuzumab + 0.5  $\mu\text{M}$  afatinib (Tra+Afa) or afatinib solvent DMSO (0.05%). Untreated (untr) cells were used as control. Cell movement was tracked for 7 hours to assess approximate average speed. The trajectories of one exemplary film for each condition are shown. The trajectories were color-coded for approximate average speed.

Figure S13

NCI-N87

DMSO

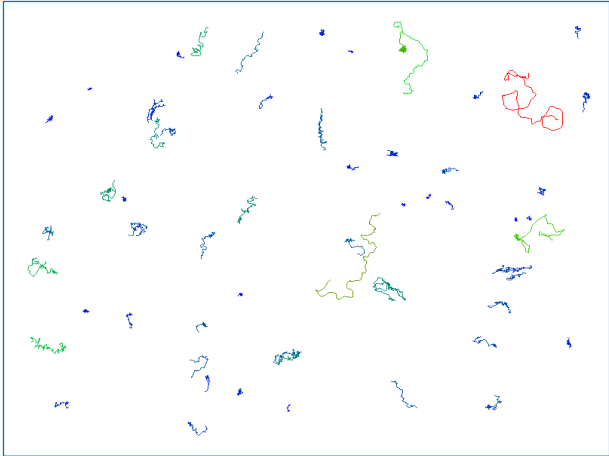

untr

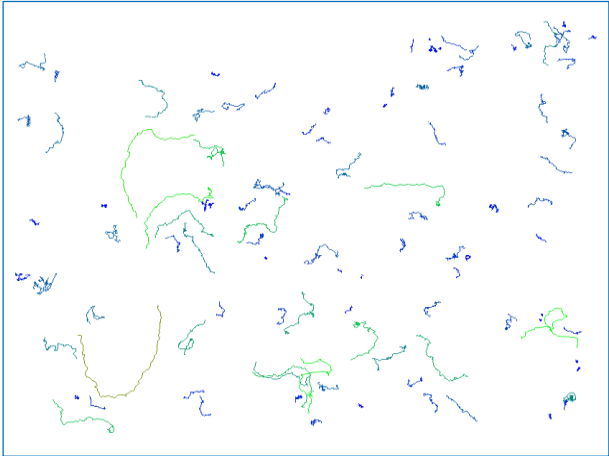

Tra

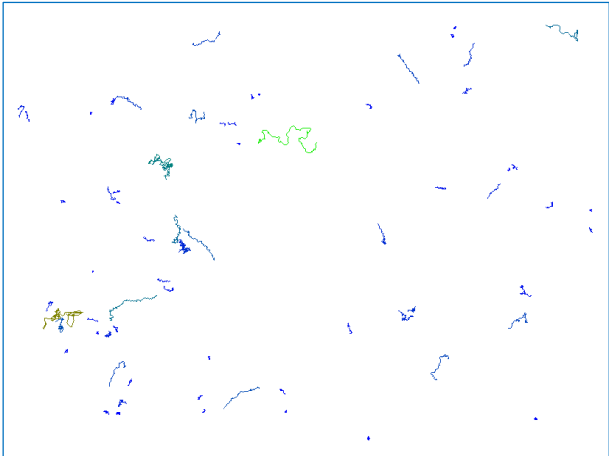

Afa

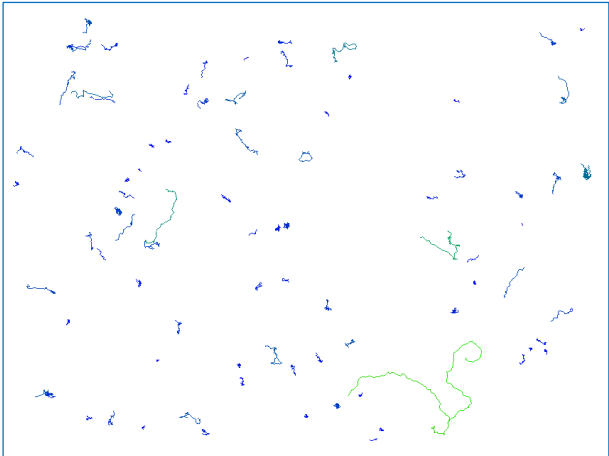

Tra+Afa

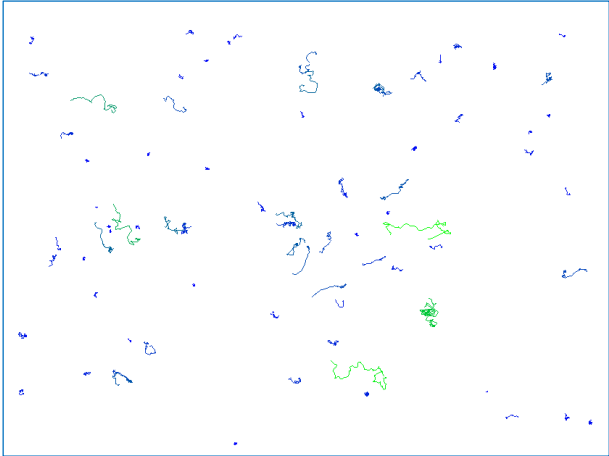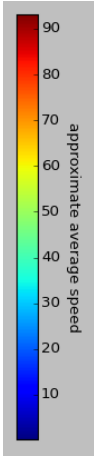

**Figure S13: Trajectories of NCI-N87 cells treated with trastuzumab or afatinib.**

NCI-N87 cells were treated with 5 µg/ml trastuzumab (Tra), 0.5 µM afatinib (Afa), 5 µg/ml trastuzumab + 0.5 µM afatinib (Tra+Afa) or afatinib solvent DMSO (0.05%). Untreated (untr) cells were used as control. Cell movement was tracked for 7 hours to assess approximate average speed. The trajectories of one exemplary film for each condition are shown. The trajectories were color-coded for approximate average speed.

Figure S14

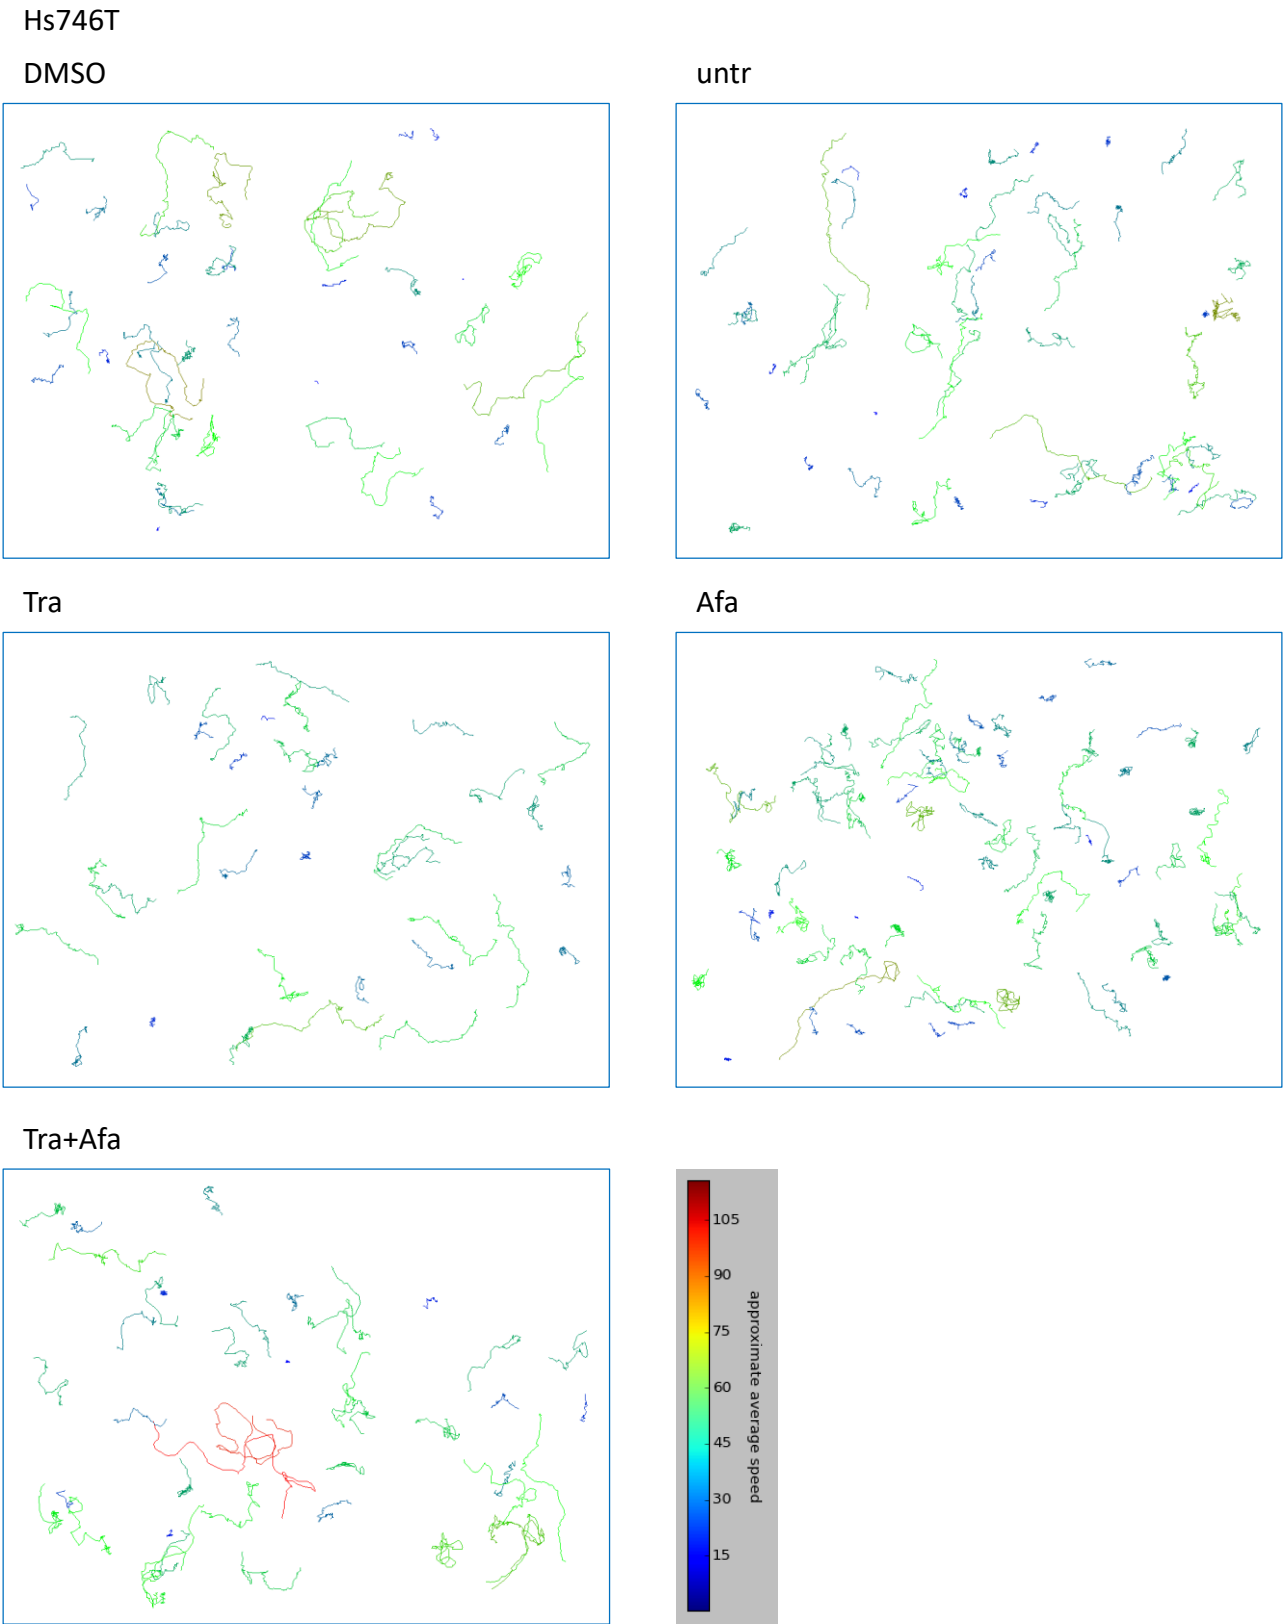

**Figure S14: Trajectories of Hs746T cells treated with trastuzumab or afatinib.**  
Hs746T cells were treated with 5  $\mu\text{g/ml}$  trastuzumab (Tra), 0.5  $\mu\text{M}$  afatinib (Afa), 5  $\mu\text{g/ml}$  trastuzumab + 0.5  $\mu\text{M}$  afatinib (Tra+Afa) or afatinib solvent DMSO (0.05%). Untreated (untr) cells were used as control. Cell movement was tracked for 7 hours to assess approximate average speed. The trajectories of one exemplary film for each condition are shown. The trajectories were color-coded for approximate average speed.
