# Supplementary material for: Determining the effects of trastuzumab, cetuximab and afatinib by phosphoprotein, gene expression and phenotypic analysis in gastric cancer cell lines
Source: PubMed Central journal article supplement (PMC7594334; doi:10.1186/s12885-020-07540-7), 2020-10-28
Supplement: 12885_2020_7540_MOESM4_ESM.pdf [file 12885_2020_7540_MOESM4_ESM.pdf]

**Table S1: Correlation of gene expression measured by RNA sequencing and qPCR.**

| RNA Seq /qPCR |           |         |            |
|---------------|-----------|---------|------------|
| Gene          | Cell line | Pearson | p adjusted |
| <i>HBEGF</i>  | MKN1      | 0.9008  | 0.0152     |
| <i>HBEGF</i>  | MKN7      | 0.9936  | 0.0509     |
| <i>HBEGF</i>  | Hs746T    | -0.4851 | 0.8875     |
| <i>HBEGF</i>  | NCI-N87   | 0.9859  | 0.0699     |
| <i>CD274</i>  | NCI-N87   | 0.9969  | 0.0472     |
| <i>CD274</i>  | MKN7      | 0.9955  | 0.0509     |

**Table S2: Significantly enriched KEGG pathways in MKN1 cells after 4 h cetuximab treatment.**

| ID       | Description                                          | GeneRatio | BgRatio  | p.adjust   |
|----------|------------------------------------------------------|-----------|----------|------------|
| hsa05323 | Rheumatoid arthritis                                 | 6/43      | 70/5844  | 0.00120571 |
| hsa04657 | IL-17 signaling pathway                              | 6/43      | 79/5844  | 0.00121677 |
| hsa04060 | Cytokine-cytokine receptor interaction               | 8/43      | 186/5844 | 0.00198674 |
| hsa04668 | TNF signaling pathway                                | 6/43      | 102/5844 | 0.00259938 |
| hsa04010 | MAPK signaling pathway                               | 8/43      | 272/5844 | 0.01366521 |
| hsa04062 | Chemokine signaling pathway                          | 6/43      | 145/5844 | 0.01366521 |
| hsa05202 | Transcriptional misregulation in cancer              | 6/43      | 168/5844 | 0.02194309 |
| hsa05161 | Hepatitis B                                          | 5/43      | 125/5844 | 0.0277262  |
| hsa05132 | Salmonella infection                                 | 4/43      | 75/5844  | 0.0277262  |
| hsa05224 | Breast cancer                                        | 5/43      | 139/5844 | 0.03890197 |
| hsa04660 | T cell receptor signaling pathway                    | 4/43      | 89/5844  | 0.04230156 |
| hsa05167 | Kaposi's sarcoma-associated herpesvirus infection    | 5/43      | 155/5844 | 0.04767251 |
| hsa04933 | AGE-RAGE signaling pathway in diabetic complications | 4/43      | 95/5844  | 0.04767251 |

**Table S3: Significantly enriched KEGG pathways in MKN1 cells after 24 h cetuximab treatment.**

| ID       | Description                             | GeneRatio | BgRatio  | p.adjust   |
|----------|-----------------------------------------|-----------|----------|------------|
| hsa05202 | Transcriptional misregulation in cancer | 10/72     | 168/5844 | 0.00617194 |

**Table S4: Significantly enriched Reactome pathways in MKN1 cells after 4 h cetuximab treatment.**

| ID     | Description                         | GeneRatio | BgRatio  | p.adjust   |
|--------|-------------------------------------|-----------|----------|------------|
| 380108 | Chemokine receptors bind chemokines | 5/39      | 31/5594  | 0.00039879 |
| 375276 | Peptide ligand-binding receptors    | 6/39      | 119/5594 | 0.01591128 |

**Table S5: Significantly enriched KEGG pathways in MKN1 cells after 4 h EGF treatment.**

| ID       | Description                                          | GeneRatio | BgRatio  | p.adjust   |
|----------|------------------------------------------------------|-----------|----------|------------|
| hsa04657 | IL-17 signaling pathway                              | 11/103    | 79/5844  | 1.7557E-05 |
| hsa04060 | Cytokine-cytokine receptor interaction               | 15/103    | 186/5844 | 6.1425E-05 |
| hsa04668 | TNF signaling pathway                                | 11/103    | 102/5844 | 8.2434E-05 |
| hsa05323 | Rheumatoid arthritis                                 | 8/103     | 70/5844  | 0.0011995  |
| hsa05205 | Proteoglycans in cancer                              | 12/103    | 186/5844 | 0.00325511 |
| hsa04621 | NOD-like receptor signaling pathway                  | 10/103    | 140/5844 | 0.00469904 |
| hsa04390 | Hippo signaling pathway                              | 10/103    | 146/5844 | 0.00569143 |
| hsa05132 | Salmonella infection                                 | 7/103     | 75/5844  | 0.00707786 |
| hsa05200 | Pathways in cancer                                   | 19/103    | 469/5844 | 0.00883296 |
| hsa05217 | Basal cell carcinoma                                 | 6/103     | 58/5844  | 0.00883296 |
| hsa05219 | Bladder cancer                                       | 5/103     | 39/5844  | 0.00887918 |
| hsa04012 | ErbB signaling pathway                               | 7/103     | 84/5844  | 0.00946041 |
| hsa04062 | Chemokine signaling pathway                          | 9/103     | 145/5844 | 0.0130742  |
| hsa04933 | AGE-RAGE signaling pathway in diabetic complications | 7/103     | 95/5844  | 0.01689209 |
| hsa05161 | Hepatitis B                                          | 8/103     | 125/5844 | 0.0179504  |
| hsa05224 | Breast cancer                                        | 8/103     | 139/5844 | 0.03198886 |
| hsa05146 | Amoebiasis                                           | 6/103     | 82/5844  | 0.03198886 |
| hsa01522 | Endocrine resistance                                 | 6/103     | 90/5844  | 0.04798049 |

**Table S6: Significantly enriched KEGG pathways in MKN1 cells after 24 h EGF treatment.**

| ID       | Description                             | GeneRatio | BgRatio  | p.adjust   |
|----------|-----------------------------------------|-----------|----------|------------|
| hsa04060 | Cytokine-cytokine receptor interaction  | 31/389    | 186/5844 | 0.00038465 |
| hsa05202 | Transcriptional misregulation in cancer | 26/389    | 168/5844 | 0.00537984 |
| hsa04630 | Jak-STAT signaling pathway              | 20/389    | 125/5844 | 0.01567177 |
| hsa04974 | Protein digestion and absorption        | 14/389    | 72/5844  | 0.01567177 |
| hsa04510 | Focal adhesion                          | 26/389    | 190/5844 | 0.01718496 |
| hsa04151 | PI3K-Akt signaling pathway              | 35/389    | 296/5844 | 0.02233751 |
| hsa04610 | Complement and coagulation cascades     | 12/389    | 61/5844  | 0.02233751 |
| hsa04512 | ECM-receptor interaction                | 13/389    | 74/5844  | 0.03600776 |
| hsa05205 | Proteoglycans in cancer                 | 24/389    | 186/5844 | 0.03787779 |

**Table S7: Significantly enriched Reactome pathways in MKN1 cells after 4 h EGF treatment.**

| ID     | Description                         | GeneRatio | BgRatio  | p.adjust   |
|--------|-------------------------------------|-----------|----------|------------|
| 380108 | Chemokine receptors bind chemokines | 7/98      | 31/5594  | 0.00027319 |
| 375276 | Peptide ligand-binding receptors    | 9/98      | 119/5594 | 0.03119512 |
| 372790 | Signaling by GPCR                   | 19/98     | 453/5594 | 0.03119512 |
| 500792 | GPCR ligand binding                 | 13/98     | 253/5594 | 0.03754235 |

**Table S8: Significantly enriched Reactome pathways in MKN1 cells after 24 h EGF treatment.**

| ID      | Description                                                  | GeneRatio | BgRatio  | p.adjust   |
|---------|--------------------------------------------------------------|-----------|----------|------------|
| 373076  | Class A/1 (Rhodopsin-like receptors)                         | 39/379    | 202/5594 | 7.9336E-07 |
| 500792  | GPCR ligand binding                                          | 44/379    | 253/5594 | 1.0274E-06 |
| 375276  | Peptide ligand-binding receptors                             | 26/379    | 119/5594 | 1.3179E-05 |
| 1474228 | Degradation of the extracellular matrix                      | 21/379    | 99/5594  | 0.00032029 |
| 1442490 | Collagen degradation                                         | 15/379    | 57/5594  | 0.00046803 |
| 372790  | Signaling by GPCR                                            | 56/379    | 453/5594 | 0.00048009 |
| 3000178 | ECM proteoglycans                                            | 15/379    | 59/5594  | 0.00048009 |
| 2022090 | Assembly of collagen fibrils and other multimeric structures | 12/379    | 39/5594  | 0.00048009 |
| 388396  | GPCR downstream signaling                                    | 48/379    | 387/5594 | 0.00157328 |
| 1474244 | Extracellular matrix organization                            | 32/379    | 227/5594 | 0.00322589 |
| 380108  | Chemokine receptors bind chemokines                          | 9/379     | 31/5594  | 0.00876351 |
| 446107  | Type I hemidesmosome assembly                                | 5/379     | 10/5594  | 0.01465555 |
| 879518  | Transport of organic anions                                  | 5/379     | 11/5594  | 0.0230509  |
| 216083  | Integrin cell surface interactions                           | 14/379    | 76/5594  | 0.0230509  |
| 1474290 | Collagen formation                                           | 13/379    | 69/5594  | 0.0271921  |
| 418594  | G alpha (i) signalling events                                | 18/379    | 116/5594 | 0.02980547 |
| 140875  | Common Pathway of Fibrin Clot Formation                      | 6/379     | 19/5594  | 0.04380188 |
| 2022870 | Chondroitin sulfate biosynthesis                             | 6/379     | 19/5594  | 0.04380188 |

**Table S9: Significantly enriched KEGG pathways in NCI-N87 cells after 4 h afatinib treatment.**

| ID       | Description                            | GeneRatio | BgRatio  | p.adjust   |
|----------|----------------------------------------|-----------|----------|------------|
| hsa04668 | TNF signaling pathway                  | 11/147    | 102/5844 | 0.00964085 |
| hsa05132 | Salmonella infection                   | 9/147     | 75/5844  | 0.01059343 |
| hsa04060 | Cytokine-cytokine receptor interaction | 14/147    | 186/5844 | 0.01599995 |

**Table S10: Significantly enriched KEGG pathways in NCI-N87 cells after 24 h afatinib treatment.**

| ID       | Description                       | GeneRatio | BgRatio  | p.adjust   |
|----------|-----------------------------------|-----------|----------|------------|
| hsa03030 | DNA replication                   | 32/1970   | 33/5844  | 4.4939E-12 |
| hsa03008 | Ribosome biogenesis in eukaryotes | 51/1970   | 69/5844  | 1.2039E-09 |
| hsa04110 | Cell cycle                        | 75/1970   | 118/5844 | 2.2175E-09 |
| hsa00240 | Pyrimidine metabolism             | 51/1970   | 89/5844  | 0.00022402 |
| hsa03430 | Mismatch repair                   | 17/1970   | 20/5844  | 0.00022402 |
| hsa03013 | RNA transport                     | 76/1970   | 150/5844 | 0.00054916 |
| hsa03050 | Proteasome                        | 26/1970   | 40/5844  | 0.00215398 |
| hsa03440 | Homologous recombination          | 23/1970   | 35/5844  | 0.00402141 |
| hsa00230 | Purine metabolism                 | 75/1970   | 157/5844 | 0.00524042 |
| hsa03460 | Fanconi anemia pathway            | 28/1970   | 47/5844  | 0.00659236 |
| hsa03410 | Base excision repair              | 20/1970   | 30/5844  | 0.00659236 |
| hsa03020 | RNA polymerase                    | 17/1970   | 26/5844  | 0.02392305 |
| hsa03040 | Spliceosome                       | 57/1970   | 120/5844 | 0.02583331 |

**Table S11: Significantly enriched Reactome pathways in NCI-N87 cells after 24 h afatinib treatment.**

| ID      | Description                                                   | GeneRatio | BgRatio  | p.adjust   |
|---------|---------------------------------------------------------------|-----------|----------|------------|
| 1640170 | Cell Cycle                                                    | 262/1891  | 462/5594 | 4.5934E-23 |
| 69278   | Cell Cycle, Mitotic                                           | 221/1891  | 380/5594 | 3.1704E-21 |
| 453279  | Mitotic G1-G1/S phases                                        | 81/1891   | 114/5594 | 8.6401E-14 |
| 69242   | S Phase                                                       | 78/1891   | 110/5594 | 2.8328E-13 |
| 69306   | DNA Replication                                               | 68/1891   | 92/5594  | 5.238E-13  |
| 69206   | G1/S Transition                                               | 68/1891   | 94/5594  | 2.6703E-12 |
| 69239   | Synthesis of DNA                                              | 64/1891   | 88/5594  | 9.1325E-12 |
| 2500257 | Resolution of Sister Chromatid Cohesion                       | 62/1891   | 85/5594  | 1.4512E-11 |
| 2555396 | Mitotic Metaphase and Anaphase                                | 94/1891   | 149/5594 | 1.4512E-11 |
| 68877   | Mitotic Prometaphase                                          | 65/1891   | 91/5594  | 1.508E-11  |
| 2467813 | Separation of Sister Chromatids                               | 90/1891   | 141/5594 | 1.508E-11  |
| 5663220 | RHO GTPases Activate Formins                                  | 67/1891   | 95/5594  | 1.5703E-11 |
| 68882   | Mitotic Anaphase                                              | 93/1891   | 148/5594 | 1.9281E-11 |
| 68886   | M Phase                                                       | 123/1891  | 216/5594 | 7.1954E-11 |
| 69190   | DNA strand elongation                                         | 29/1891   | 31/5594  | 2.6593E-10 |
| 69620   | Cell Cycle Checkpoints                                        | 75/1891   | 116/5594 | 4.376E-10  |
| 69481   | G2/M Checkpoints                                              | 39/1891   | 49/5594  | 3.0847E-09 |
| 68874   | M/G1 Transition                                               | 51/1891   | 72/5594  | 6.2252E-09 |
| 69002   | DNA Replication Pre-Initiation                                | 51/1891   | 72/5594  | 6.2252E-09 |
| 68962   | Activation of the pre-replicative complex                     | 25/1891   | 28/5594  | 7.605E-08  |
| 180786  | Extension of Telomeres                                        | 22/1891   | 24/5594  | 2.2875E-07 |
| 73886   | Chromosome Maintenance                                        | 47/1891   | 69/5594  | 2.2875E-07 |
| 113510  | E2F mediated regulation of DNA replication                    | 24/1891   | 28/5594  | 8.3859E-07 |
| 176187  | Activation of ATR in response to replication stress           | 28/1891   | 35/5594  | 1.018E-06  |
| 162909  | Host Interactions of HIV factors                              | 69/1891   | 118/5594 | 1.018E-06  |
| 174417  | Telomere C-strand (Lagging Strand) Synthesis                  | 20/1891   | 22/5594  | 1.4433E-06 |
| 69300   | Removal of licensing factors from origins                     | 42/1891   | 64/5594  | 5.8719E-06 |
| 69304   | Regulation of DNA replication                                 | 42/1891   | 64/5594  | 5.8719E-06 |
| 195258  | RHO GTPase Effectors                                          | 108/1891  | 213/5594 | 5.8719E-06 |
| 69186   | Lagging Strand Synthesis                                      | 18/1891   | 20/5594  | 9.1619E-06 |
| 68867   | Assembly of the pre-replicative complex                       | 39/1891   | 59/5594  | 1.1432E-05 |
| 68949   | Orc1 removal from chromatin                                   | 40/1891   | 62/5594  | 2.0015E-05 |
| 69052   | Switching of origins to a post-replicative state              | 40/1891   | 62/5594  | 2.0015E-05 |
| 174411  | Polymerase switching on the C-strand of the telomere          | 13/1891   | 13/5594  | 2.0098E-05 |
| 69091   | Polymerase switching                                          | 13/1891   | 13/5594  | 2.0098E-05 |
| 69109   | Leading Strand Synthesis                                      | 13/1891   | 13/5594  | 2.0098E-05 |
| 177243  | Interactions of Rev with host cellular proteins               | 24/1891   | 32/5594  | 5.7049E-05 |
| 176974  | Unwinding of DNA                                              | 11/1891   | 11/5594  | 0.00017    |
| 109977  | Repair synthesis for gap-filling by DNA polymerase in TC-NER  | 13/1891   | 14/5594  | 0.00017    |
| 74967   | Repair synthesis of patch ~27-30 bases long by DNA polymerase | 13/1891   | 14/5594  | 0.00017    |
| 73894   | DNA Repair                                                    | 70/1891   | 134/5594 | 0.00017    |
| 165054  | Rev-mediated nuclear export of HIV RNA                        | 22/1891   | 30/5594  | 0.00024    |

|                |                                                                              |          |          |         |
|----------------|------------------------------------------------------------------------------|----------|----------|---------|
| <b>180746</b>  | Nuclear import of Rev protein                                                | 22/1891  | 30/5594  | 0.00024 |
| <b>72203</b>   | Processing of Capped Intron-Containing Pre-mRNA                              | 60/1891  | 112/5594 | 0.00024 |
| <b>162906</b>  | HIV Infection                                                                | 97/1891  | 201/5594 | 0.00024 |
| <b>194315</b>  | Signaling by Rho GTPases                                                     | 143/1891 | 317/5594 | 0.00024 |
| <b>191859</b>  | snRNP Assembly                                                               | 17/1891  | 21/5594  | 0.00025 |
| <b>194441</b>  | Metabolism of non-coding RNA                                                 | 17/1891  | 21/5594  | 0.00025 |
| <b>109979</b>  | Gap-filling DNA repair synthesis and ligation in TC-NER                      | 14/1891  | 16/5594  | 0.00028 |
| <b>74969</b>   | Gap-filling DNA repair synthesis and ligation in GG-NER                      | 14/1891  | 16/5594  | 0.00028 |
| <b>69202</b>   | Cyclin E associated events during G1/S transition                            | 34/1891  | 55/5594  | 0.00035 |
| <b>69166</b>   | Removal of the Flap Intermediate                                             | 12/1891  | 13/5594  | 0.00036 |
| <b>69205</b>   | G1/S-Specific Transcription                                                  | 12/1891  | 13/5594  | 0.00036 |
| <b>68827</b>   | CDT1 association with the CDC6:ORC:origin complex                            | 33/1891  | 53/5594  | 0.00036 |
| <b>390466</b>  | Chaperonin-mediated protein folding                                          | 20/1891  | 27/5594  | 0.00039 |
| <b>72163</b>   | mRNA Splicing - Major Pathway                                                | 57/1891  | 108/5594 | 0.00056 |
| <b>72172</b>   | mRNA Splicing                                                                | 57/1891  | 108/5594 | 0.00056 |
| <b>69183</b>   | Processive synthesis on the lagging strand                                   | 13/1891  | 15/5594  | 0.00062 |
| <b>174143</b>  | APC/C-mediated degradation of cell cycle proteins                            | 42/1891  | 74/5594  | 0.00063 |
| <b>453276</b>  | Regulation of mitotic cell cycle                                             | 42/1891  | 74/5594  | 0.00063 |
| <b>389957</b>  | Prefoldin mediated transfer of substrate to CCT/TriC                         | 19/1891  | 26/5594  | 0.00076 |
| <b>389958</b>  | Cooperation of Prefoldin and TriC/CCT in actin and tubulin folding           | 19/1891  | 26/5594  | 0.00076 |
| <b>157579</b>  | Telomere Maintenance                                                         | 27/1891  | 42/5594  | 0.00078 |
| <b>72165</b>   | mRNA Splicing - Minor Pathway                                                | 25/1891  | 38/5594  | 0.00082 |
| <b>5357801</b> | Programmed Cell Death                                                        | 70/1891  | 141/5594 | 0.00093 |
| <b>389960</b>  | Formation of tubulin folding intermediates by CCT/TriC                       | 15/1891  | 19/5594  | 0.00106 |
| <b>210991</b>  | Basigin interactions                                                         | 17/1891  | 23/5594  | 0.00140 |
| <b>379716</b>  | Cytosolic tRNA aminoacylation                                                | 17/1891  | 23/5594  | 0.00140 |
| <b>189200</b>  | Hexose transport                                                             | 25/1891  | 39/5594  | 0.00145 |
| <b>70153</b>   | Glucose transport                                                            | 24/1891  | 37/5594  | 0.00149 |
| <b>176033</b>  | Interactions of Vpr with host cellular proteins                              | 22/1891  | 33/5594  | 0.00156 |
| <b>5389840</b> | Mitochondrial translation elongation                                         | 39/1891  | 70/5594  | 0.00172 |
| <b>5651801</b> | PCNA-Dependent Long Patch Base Excision Repair                               | 13/1891  | 16/5594  | 0.00181 |
| <b>77588</b>   | SLBP Dependent Processing of Replication-Dependent Histone Pre-mRNAs         | 10/1891  | 11/5594  | 0.00195 |
| <b>15869</b>   | Metabolism of nucleotides                                                    | 41/1891  | 75/5594  | 0.00197 |
| <b>176814</b>  | Activation of APC/C and APC/C:Cdc20 mediated degradation of mitotic proteins | 37/1891  | 66/5594  | 0.00203 |
| <b>110373</b>  | Resolution of AP sites via the multiple-nucleotide patch replacement pathway | 14/1891  | 18/5594  | 0.00215 |
| <b>5607761</b> | Dectin-1 mediated noncanonical NF-kB signaling                               | 31/1891  | 53/5594  | 0.00234 |
| <b>69656</b>   | Cyclin A:Cdk2-associated events at S phase entry                             | 31/1891  | 53/5594  | 0.00234 |
| <b>109581</b>  | Apoptosis                                                                    | 67/1891  | 138/5594 | 0.00252 |
| <b>176408</b>  | Regulation of APC/C activators between G1/S and early anaphase               | 38/1891  | 69/5594  | 0.00258 |
| <b>168325</b>  | Viral Messenger RNA Synthesis                                                | 18/1891  | 26/5594  | 0.00276 |
| <b>170822</b>  | Regulation of Glucokinase by Glucokinase Regulatory Protein                  | 19/1891  | 28/5594  | 0.00276 |
| <b>180910</b>  | Vpr-mediated nuclear import of PICs                                          | 20/1891  | 30/5594  | 0.00276 |
| <b>5358565</b> | Mismatch repair (MMR) directed by MSH2:MSH6 (MutSalpha)                      | 11/1891  | 13/5594  | 0.00278 |
| <b>69601</b>   | Ubiquitin Mediated Degradation of Phosphorylated Cdc25A                      | 28/1891  | 47/5594  | 0.00278 |

|         |                                                                                                          |         |          |         |
|---------|----------------------------------------------------------------------------------------------------------|---------|----------|---------|
| 69610   | p53-Independent DNA Damage Response                                                                      | 28/1891 | 47/5594  | 0.00278 |
| 69613   | p53-Independent G1/S DNA damage checkpoint                                                               | 28/1891 | 47/5594  | 0.00278 |
| 169911  | Regulation of Apoptosis                                                                                  | 27/1891 | 45/5594  | 0.00291 |
| 69229   | Ubiquitin-dependent degradation of Cyclin D1                                                             | 27/1891 | 45/5594  | 0.00291 |
| 75815   | Ubiquitin-dependent degradation of Cyclin D                                                              | 27/1891 | 45/5594  | 0.00291 |
| 176409  | APC/C:Cdc20 mediated degradation of mitotic proteins                                                     | 36/1891 | 65/5594  | 0.00291 |
| 179419  | APC:Cdc20 mediated degradation of cell cycle proteins prior to satisfaction of the cell cycle checkpoint | 35/1891 | 63/5594  | 0.00316 |
| 74159   | Transcription                                                                                            | 70/1891 | 147/5594 | 0.00324 |
| 69473   | G2/M DNA damage checkpoint                                                                               | 12/1891 | 15/5594  | 0.00338 |
| 69615   | G1/S DNA Damage Checkpoints                                                                              | 30/1891 | 52/5594  | 0.00340 |
| 111367  | SLBP independent Processing of Histone Pre-mRNAs                                                         | 9/1891  | 10/5594  | 0.00404 |
| 180585  | Vif-mediated degradation of APOBEC3G                                                                     | 28/1891 | 48/5594  | 0.00408 |
| 1538133 | G0 and Early G1                                                                                          | 14/1891 | 19/5594  | 0.00432 |
| 2151201 | Transcriptional activation of mitochondrial biogenesis                                                   | 14/1891 | 19/5594  | 0.00432 |
| 3301854 | Nuclear Pore Complex (NPC) Disassembly                                                                   | 20/1891 | 31/5594  | 0.00432 |
| 187577  | SCF(Skp2)-mediated degradation of p27/p21                                                                | 27/1891 | 46/5594  | 0.00432 |
| 450531  | Regulation of mRNA stability by proteins that bind AU-rich elements                                      | 41/1891 | 78/5594  | 0.00437 |
| 983189  | Kinesins                                                                                                 | 15/1891 | 21/5594  | 0.00446 |
| 211733  | Regulation of activated PAK-2p34 by proteasome mediated degradation                                      | 26/1891 | 44/5594  | 0.00454 |
| 350562  | Regulation of ornithine decarboxylase (ODC)                                                              | 26/1891 | 44/5594  | 0.00454 |
| 69017   | CDK-mediated phosphorylation and removal of Cdc6                                                         | 26/1891 | 44/5594  | 0.00454 |
| 174184  | Cdc20:Phospho-APC/C mediated degradation of Cyclin A                                                     | 34/1891 | 62/5594  | 0.00458 |
| 5368287 | Mitochondrial translation                                                                                | 40/1891 | 76/5594  | 0.00467 |
| 1236978 | Cross-presentation of soluble exogenous antigens (endosomes)                                             | 24/1891 | 40/5594  | 0.00531 |
| 111447  | Activation of BAD and translocation to mitochondria                                                      | 10/1891 | 12/5594  | 0.00538 |
| 75035   | Chk1/Chk2(Cds1) mediated inactivation of Cyclin B:Cdk1 complex                                           | 10/1891 | 12/5594  | 0.00538 |
| 174113  | SCF-beta-TrCP mediated degradation of Emi1                                                               | 28/1891 | 49/5594  | 0.00562 |
| 5419276 | Mitochondrial translation termination                                                                    | 37/1891 | 70/5594  | 0.00644 |
| 5358508 | Mismatch Repair                                                                                          | 11/1891 | 14/5594  | 0.00670 |
| 391251  | Protein folding                                                                                          | 20/1891 | 32/5594  | 0.00688 |
| 73847   | Purine metabolism                                                                                        | 20/1891 | 32/5594  | 0.00688 |
| 69231   | Cyclin D associated events in G1                                                                         | 18/1891 | 28/5594  | 0.00765 |
| 69236   | G1 Phase                                                                                                 | 18/1891 | 28/5594  | 0.00765 |
| 419524  | Fanconi Anemia pathway                                                                                   | 16/1891 | 24/5594  | 0.00822 |
| 114452  | Activation of BH3-only proteins                                                                          | 15/1891 | 22/5594  | 0.00829 |
| 174178  | APC/C:Cdh1 mediated degradation of Cdc20 and other APC/C:Cdh1 targeted proteins in late mitosis/early G1 | 34/1891 | 64/5594  | 0.00867 |
| 180534  | Vpu mediated degradation of CD4                                                                          | 26/1891 | 46/5594  | 0.00999 |
| 425374  | Amino acid and oligopeptide SLC transporters                                                             | 25/1891 | 44/5594  | 0.01107 |
| 202733  | Cell surface interactions at the vascular wall                                                           | 42/1891 | 84/5594  | 0.01162 |
| 174414  | Processive synthesis on the C-strand of the telomere                                                     | 9/1891  | 11/5594  | 0.01180 |
| 73817   | Purine ribonucleoside monophosphate biosynthesis                                                         | 9/1891  | 11/5594  | 0.01180 |
| 73884   | Base Excision Repair                                                                                     | 19/1891 | 31/5594  | 0.01180 |
| 425407  | SLC-mediated transmembrane transport                                                                     | 99/1891 | 229/5594 | 0.01180 |

|                |                                                                             |         |          |         |
|----------------|-----------------------------------------------------------------------------|---------|----------|---------|
| <b>352230</b>  | Amino acid transport across the plasma membrane                             | 18/1891 | 29/5594  | 0.01228 |
| <b>450408</b>  | AUF1 (hnRNP D0) destabilizes mRNA                                           | 27/1891 | 49/5594  | 0.01228 |
| <b>69563</b>   | p53-Dependent G1 DNA Damage Response                                        | 27/1891 | 49/5594  | 0.01228 |
| <b>69580</b>   | p53-Dependent G1/S DNA damage checkpoint                                    | 27/1891 | 49/5594  | 0.01228 |
| <b>3108214</b> | SUMOylation of DNA damage response and repair proteins                      | 36/1891 | 70/5594  | 0.01228 |
| <b>3108232</b> | SUMO E3 ligases SUMOylate target proteins                                   | 36/1891 | 70/5594  | 0.01228 |
| <b>5368286</b> | Mitochondrial translation initiation                                        | 36/1891 | 70/5594  | 0.01228 |
| <b>1236974</b> | ER-Phagosome pathway                                                        | 30/1891 | 56/5594  | 0.01256 |
| <b>2990846</b> | SUMOylation                                                                 | 38/1891 | 75/5594  | 0.01279 |
| <b>5358606</b> | Mismatch repair (MMR) directed by MSH2:MSH3 (MutSbeta)                      | 10/1891 | 13/5594  | 0.01308 |
| <b>110314</b>  | Recognition of DNA damage by PCNA-containing replication complex            | 16/1891 | 25/5594  | 0.01325 |
| <b>606279</b>  | Deposition of new CENPA-containing nucleosomes at the centromere            | 22/1891 | 38/5594  | 0.01325 |
| <b>774815</b>  | Nucleosome assembly                                                         | 22/1891 | 38/5594  | 0.01325 |
| <b>69541</b>   | Stabilization of p53                                                        | 26/1891 | 47/5594  | 0.01325 |
| <b>1169408</b> | ISG15 antiviral mechanism                                                   | 32/1891 | 61/5594  | 0.01332 |
| <b>1169410</b> | Antiviral mechanism by IFN-stimulated genes                                 | 32/1891 | 61/5594  | 0.01332 |
| <b>73780</b>   | RNA Polymerase III Chain Elongation                                         | 11/1891 | 15/5594  | 0.01365 |
| <b>73980</b>   | RNA Polymerase III Transcription Termination                                | 11/1891 | 15/5594  | 0.01365 |
| <b>3371453</b> | Regulation of HSF1-mediated heat shock response                             | 28/1891 | 52/5594  | 0.01482 |
| <b>109688</b>  | Cleavage of Growing Transcript in the Termination Region                    | 24/1891 | 43/5594  | 0.01568 |
| <b>73856</b>   | RNA Polymerase II Transcription Termination                                 | 24/1891 | 43/5594  | 0.01568 |
| <b>76044</b>   | Post-Elongation Processing of the Transcript                                | 24/1891 | 43/5594  | 0.01568 |
| <b>4641258</b> | degradation of DVL                                                          | 27/1891 | 50/5594  | 0.01630 |
| <b>109606</b>  | Intrinsic Pathway for Apoptosis                                             | 19/1891 | 32/5594  | 0.01680 |
| <b>2980766</b> | Nuclear Envelope Breakdown                                                  | 23/1891 | 41/5594  | 0.01724 |
| <b>1268020</b> | Mitochondrial protein import                                                | 18/1891 | 30/5594  | 0.01801 |
| <b>73933</b>   | Resolution of Abasic Sites (AP sites)                                       | 18/1891 | 30/5594  | 0.01801 |
| <b>983168</b>  | Antigen processing: Ubiquitination & Proteasome degradation                 | 26/1891 | 48/5594  | 0.01801 |
| <b>379724</b>  | tRNA Aminoacylation                                                         | 22/1891 | 39/5594  | 0.01884 |
| <b>68875</b>   | Mitotic Prophase                                                            | 36/1891 | 72/5594  | 0.01941 |
| <b>349425</b>  | Autodegradation of the E3 ubiquitin ligase COP1                             | 25/1891 | 46/5594  | 0.01970 |
| <b>5610783</b> | Degradation of GLI2 by the proteasome                                       | 28/1891 | 53/5594  | 0.01970 |
| <b>1236975</b> | Antigen processing-Cross presentation                                       | 33/1891 | 65/5594  | 0.02045 |
| <b>70263</b>   | Gluconeogenesis                                                             | 16/1891 | 26/5594  | 0.02071 |
| <b>113507</b>  | E2F-enabled inhibition of pre-replication complex formation                 | 8/1891  | 10/5594  | 0.02250 |
| <b>983169</b>  | Class I MHC mediated antigen processing & presentation                      | 39/1891 | 80/5594  | 0.02280 |
| <b>4641257</b> | degradation of AXIN                                                         | 26/1891 | 49/5594  | 0.02451 |
| <b>73937</b>   | Transcription-coupled NER (TC-NER)                                          | 22/1891 | 40/5594  | 0.02713 |
| <b>174154</b>  | APC/C:Cdc20 mediated degradation of Securin                                 | 30/1891 | 59/5594  | 0.02884 |
| <b>73857</b>   | RNA Polymerase II Transcription                                             | 47/1891 | 101/5594 | 0.02942 |
| <b>5610780</b> | Degradation of GLI1 by the proteasome                                       | 27/1891 | 52/5594  | 0.03002 |
| <b>1592230</b> | Mitochondrial biogenesis                                                    | 16/1891 | 27/5594  | 0.03340 |
| <b>5362768</b> | Hh mutants that don't undergo autocatalytic processing are degraded by ERAD | 25/1891 | 48/5594  | 0.03802 |
| <b>5387390</b> | Hh mutants abrogate ligand secretion                                        | 25/1891 | 48/5594  | 0.03802 |

|                |                                                   |         |          |         |
|----------------|---------------------------------------------------|---------|----------|---------|
| <b>112297</b>  | Post-Elongation Processing of Intronless pre-mRNA | 14/1891 | 23/5594  | 0.03964 |
| <b>75067</b>   | Processing of Capped Intronless Pre-mRNA          | 14/1891 | 23/5594  | 0.03964 |
| <b>5610785</b> | GLI3 is processed to GLI3R by the proteasome      | 27/1891 | 53/5594  | 0.04038 |
| <b>109970</b>  | Global Genomic NER (GG-NER)                       | 18/1891 | 32/5594  | 0.04118 |
| <b>73890</b>   | Double-Strand Break Repair                        | 13/1891 | 21/5594  | 0.04259 |
| <b>162587</b>  | HIV Life Cycle                                    | 56/1891 | 126/5594 | 0.04295 |

**Table S12: Significantly enriched KEGG pathways in MKN1 cells after 4 h afatinib treatment.**

| ID              | Description                                          | GeneRatio | BgRatio  | p.adjust   |
|-----------------|------------------------------------------------------|-----------|----------|------------|
| <b>hsa04668</b> | TNF signaling pathway                                | 10/66     | 102/5844 | 2.3777E-05 |
| <b>hsa05323</b> | Rheumatoid arthritis                                 | 8/66      | 70/5844  | 7.028E-05  |
| <b>hsa04657</b> | IL-17 signaling pathway                              | 8/66      | 79/5844  | 0.00011952 |
| <b>hsa04060</b> | Cytokine-cytokine receptor interaction               | 11/66     | 186/5844 | 0.00022227 |
| <b>hsa04933</b> | AGE-RAGE signaling pathway in diabetic complications | 8/66      | 95/5844  | 0.00028978 |
| <b>hsa04010</b> | MAPK signaling pathway                               | 11/66     | 272/5844 | 0.00427566 |
| <b>hsa05132</b> | Salmonella infection                                 | 6/66      | 75/5844  | 0.00427566 |
| <b>hsa05142</b> | Chagas disease (American trypanosomiasis)            | 6/66      | 81/5844  | 0.00519986 |
| <b>hsa05144</b> | Malaria                                              | 4/66      | 35/5844  | 0.01002006 |
| <b>hsa05206</b> | MicroRNAs in cancer                                  | 7/66      | 149/5844 | 0.02029889 |
| <b>hsa05167</b> | Kaposi's sarcoma-associated herpesvirus infection    | 7/66      | 155/5844 | 0.02319695 |
| <b>hsa05200</b> | Pathways in cancer                                   | 13/66     | 469/5844 | 0.02329389 |
| <b>hsa04064</b> | NF-kappa B signaling pathway                         | 5/66      | 82/5844  | 0.02329389 |
| <b>hsa05146</b> | Amoebiasis                                           | 5/66      | 82/5844  | 0.02329389 |
| <b>hsa05134</b> | Legionellosis                                        | 4/66      | 50/5844  | 0.02329389 |
| <b>hsa05202</b> | Transcriptional misregulation in cancer              | 7/66      | 168/5844 | 0.024013   |
| <b>hsa05161</b> | Hepatitis B                                          | 6/66      | 125/5844 | 0.024013   |
| <b>hsa05166</b> | HTLV-I infection                                     | 8/66      | 231/5844 | 0.03368798 |
| <b>hsa05140</b> | Leishmaniasis                                        | 4/66      | 59/5844  | 0.03368798 |
| <b>hsa04621</b> | NOD-like receptor signaling pathway                  | 6/66      | 140/5844 | 0.0343651  |
| <b>hsa04610</b> | Complement and coagulation cascades                  | 4/66      | 61/5844  | 0.0343651  |
| <b>hsa04062</b> | Chemokine signaling pathway                          | 6/66      | 145/5844 | 0.03858289 |
| <b>hsa05133</b> | Pertussis                                            | 4/66      | 65/5844  | 0.03936097 |
| <b>hsa04640</b> | Hematopoietic cell lineage                           | 4/66      | 69/5844  | 0.04657383 |

**Table S13: Significantly enriched KEGG pathways in MKN1 cells after 24 h afatinib treatment.**

| ID              | Description                | GeneRatio | BgRatio | p.adjust   |
|-----------------|----------------------------|-----------|---------|------------|
| <b>hsa04640</b> | Hematopoietic cell lineage | 11/206    | 69/5844 | 0.00617019 |



**Table S14: Significantly enriched Reactome pathways in MKN1 cells after 4 h afatinib treatment.**

| ID      | Description                                                                  | GeneRatio | BgRatio  | p.adjust   |
|---------|------------------------------------------------------------------------------|-----------|----------|------------|
| 380108  | Chemokine receptors bind chemokines                                          | 5/60      | 31/5594  | 0.00376562 |
| 937061  | TRIF-mediated TLR3/TLR4 signaling                                            | 6/60      | 76/5594  | 0.00709969 |
| 450282  | MAPK targets/ Nuclear events mediated by MAP kinases                         | 4/60      | 26/5594  | 0.00709969 |
| 166166  | MyD88-independent TLR3/TLR4 cascade                                          | 6/60      | 77/5594  | 0.00709969 |
| 168164  | Toll Like Receptor 3 (TLR3) Cascade                                          | 6/60      | 77/5594  | 0.00709969 |
| 166054  | Activated TLR4 signalling                                                    | 6/60      | 89/5594  | 0.01312667 |
| 166016  | Toll Like Receptor 4 (TLR4) Cascade                                          | 6/60      | 92/5594  | 0.01346718 |
| 198753  | ERK/MAPK targets                                                             | 3/60      | 17/5594  | 0.0159905  |
| 168898  | Toll-Like Receptors Cascades                                                 | 6/60      | 105/5594 | 0.0159905  |
| 166058  | MyD88:Mal cascade initiated on plasma membrane                               | 5/60      | 71/5594  | 0.0159905  |
| 168179  | Toll Like Receptor TLR1:TLR2 Cascade                                         | 5/60      | 71/5594  | 0.0159905  |
| 168188  | Toll Like Receptor TLR6:TLR2 Cascade                                         | 5/60      | 71/5594  | 0.0159905  |
| 181438  | Toll Like Receptor 2 (TLR2) Cascade                                          | 5/60      | 71/5594  | 0.0159905  |
| 198725  | Nuclear Events (kinase and transcription factor activation)                  | 3/60      | 20/5594  | 0.01917469 |
| 373076  | Class A/1 (Rhodopsin-like receptors)                                         | 8/60      | 202/5594 | 0.01917469 |
| 500792  | GPCR ligand binding                                                          | 9/60      | 253/5594 | 0.01917469 |
| 375276  | Peptide ligand-binding receptors                                             | 6/60      | 119/5594 | 0.02157578 |
| 450294  | MAP kinase activation in TLR cascade                                         | 4/60      | 49/5594  | 0.02248863 |
| 168180  | TRAF6 Mediated Induction of proinflammatory cytokines                        | 4/60      | 56/5594  | 0.03492941 |
| 3000178 | ECM proteoglycans                                                            | 4/60      | 59/5594  | 0.04014859 |
| 975138  | TRAF6 mediated induction of NFkB and MAP kinases upon TLR7/8 or 9 activation | 4/60      | 64/5594  | 0.04380237 |
| 168142  | Toll Like Receptor 10 (TLR10) Cascade                                        | 4/60      | 65/5594  | 0.04380237 |
| 168176  | Toll Like Receptor 5 (TLR5) Cascade                                          | 4/60      | 65/5594  | 0.04380237 |
| 168181  | Toll Like Receptor 7/8 (TLR7/8) Cascade                                      | 4/60      | 65/5594  | 0.04380237 |
| 975155  | MyD88 dependent cascade initiated on endosome                                | 4/60      | 65/5594  | 0.04380237 |
| 975871  | MyD88 cascade initiated on plasma membrane                                   | 4/60      | 65/5594  | 0.04380237 |
| 168138  | Toll Like Receptor 9 (TLR9) Cascade                                          | 4/60      | 67/5594  | 0.04699983 |
| 381042  | PERK regulates gene expression                                               | 2/60      | 11/5594  | 0.04751258 |
| 1989781 | PPARA activates gene expression                                              | 3/60      | 35/5594  | 0.04751258 |

**Table S15: Significantly enriched Reactome pathways in MKN1 cells after 24 h afatinib treatment.**

| ID      | Description                     | GeneRatio | BgRatio | p.adjust   |
|---------|---------------------------------|-----------|---------|------------|
| 1989781 | PPARA activates gene expression | 7/180     | 35/5594 | 0.04242702 |

**Table S16: Significantly enriched KEGG pathways in MKN7 cells after 4 h afatinib treatment.**

| ID       | Description                            | GeneRatio | BgRatio  | p.adjust   |
|----------|----------------------------------------|-----------|----------|------------|
| hsa01522 | Endocrine resistance                   | 9/157     | 90/5844  | 0.0337614  |
| hsa04668 | TNF signaling pathway                  | 10/157    | 102/5844 | 0.02646242 |
| hsa04060 | Cytokine-cytokine receptor interaction | 16/157    | 186/5844 | 0.00355486 |
| hsa04630 | Jak-STAT signaling pathway             | 14/157    | 125/5844 | 0.00112593 |

**Table S17: Significantly enriched KEGG pathways in MKN7 cells after 24 h afatinib treatment.**

| ID       | Description                       | GeneRatio | BgRatio  | p.adjust   |
|----------|-----------------------------------|-----------|----------|------------|
| hsa03008 | Ribosome biogenesis in eukaryotes | 25/785    | 69/5844  | 0.00039694 |
| hsa04110 | Cell cycle                        | 33/785    | 118/5844 | 0.0030143  |
| hsa03030 | DNA replication                   | 13/785    | 33/5844  | 0.01815882 |

**Table S18: Significantly enriched Reactome pathways in MKN7 cells after 24 h afatinib treatment.**

| ID      | Description                                         | GeneRatio | BgRatio  | p.adjust   |
|---------|-----------------------------------------------------|-----------|----------|------------|
| 453279  | Mitotic G1-G1/S phases                              | 40/764    | 114/5594 | 3.6681E-06 |
| 69278   | Cell Cycle, Mitotic                                 | 91/764    | 380/5594 | 6.4007E-06 |
| 69206   | G1/S Transition                                     | 34/764    | 94/5594  | 7.6198E-06 |
| 113510  | E2F mediated regulation of DNA replication          | 16/764    | 28/5594  | 1.4565E-05 |
| 1640170 | Cell Cycle                                          | 103/764   | 462/5594 | 1.4565E-05 |
| 69306   | DNA Replication                                     | 32/764    | 92/5594  | 2.8265E-05 |
| 69205   | G1/S-Specific Transcription                         | 10/764    | 13/5594  | 5.269E-05  |
| 69190   | DNA strand elongation                               | 16/764    | 31/5594  | 5.6795E-05 |
| 69242   | S Phase                                             | 35/764    | 110/5594 | 6.0213E-05 |
| 176187  | Activation of ATR in response to replication stress | 17/764    | 35/5594  | 6.1092E-05 |
| 69481   | G2/M Checkpoints                                    | 20/764    | 49/5594  | 0.00018433 |
| 69239   | Synthesis of DNA                                    | 29/764    | 88/5594  | 0.000189   |
| 68962   | Activation of the pre-replicative complex           | 14/764    | 28/5594  | 0.00029987 |
| 68877   | Mitotic Prometaphase                                | 29/764    | 91/5594  | 0.00034588 |
| 2500257 | Resolution of Sister Chromatid Cohesion             | 27/764    | 85/5594  | 0.00072655 |
| 69620   | Cell Cycle Checkpoints                              | 33/764    | 116/5594 | 0.00105427 |
| 180786  | Extension of Telomeres                              | 12/764    | 24/5594  | 0.00113179 |
| 68874   | M/G1 Transition                                     | 23/764    | 72/5594  | 0.0022782  |
| 69002   | DNA Replication Pre-Initiation                      | 23/764    | 72/5594  | 0.0022782  |
| 73886   | Chromosome Maintenance                              | 22/764    | 69/5594  | 0.00325081 |
| 2555396 | Mitotic Metaphase and Anaphase                      | 37/764    | 149/5594 | 0.0064384  |
| 176974  | Unwinding of DNA                                    | 7/764     | 11/5594  | 0.00668213 |
| 73817   | Purine ribonucleoside monophosphate biosynthesis    | 7/764     | 11/5594  | 0.00668213 |
| 2467813 | Separation of Sister Chromatids                     | 35/764    | 141/5594 | 0.00851589 |
| 174417  | Telomere C-strand (Lagging Strand) Synthesis        | 10/764    | 22/5594  | 0.00996357 |
| 68882   | Mitotic Anaphase                                    | 36/764    | 148/5594 | 0.00996357 |
| 69186   | Lagging Strand Synthesis                            | 9/764     | 20/5594  | 0.02130541 |

|               |                                                             |        |          |            |
|---------------|-------------------------------------------------------------|--------|----------|------------|
| <b>15869</b>  | Metabolism of nucleotides                                   | 21/764 | 75/5594  | 0.02459538 |
| <b>113507</b> | E2F-enabled inhibition of pre-replication complex formation | 6/764  | 10/5594  | 0.02513251 |
| <b>68886</b>  | M Phase                                                     | 46/764 | 216/5594 | 0.03263143 |
| <b>69300</b>  | Removal of licensing factors from origins                   | 18/764 | 64/5594  | 0.04742088 |
| <b>69304</b>  | Regulation of DNA replication                               | 18/764 | 64/5594  | 0.04742088 |

**Table S19: Regulated genes after afatinib and trastuzumab + afatinib treatment related to the biological function “positive regulation of cell motility”.** In MKN1 cells regulated genes are colored in blue.

| MKN1 4h Afa vs. MKN1 4h untr | MKN1 4h Tra+Afa vs. MKN1 4h untr | MKN7 4h Afa vs. MKN7 4h untr | MKN7 4h Tra+Afa vs. MKN7 4h untr | NCI-N87 4h Afa vs. NCI-N87 4h untr | NCI-N87 4h Tra+Afa vs. NCI-N87 4h untr |
|------------------------------|----------------------------------|------------------------------|----------------------------------|------------------------------------|----------------------------------------|
| <i>CCR7</i>                  | <i>CXCL1</i>                     | <i>ACKR3</i>                 | <i>SEMA7A</i>                    | <i>ARHGEF2</i>                     | <i>ARHGEF2</i>                         |
| <i>CXCL1</i>                 | <i>CXCL8</i>                     | <i>ADAM8</i>                 | <i>ACKR3</i>                     | <i>ATOH8</i>                       | <i>ATOH8</i>                           |
| <i>CXCL8</i>                 | <i>CYR61</i>                     | <i>ARHGEF2</i>               | <i>ADAM8</i>                     | <i>CXCL1</i>                       | <i>BCL2</i>                            |
| <i>CYR61</i>                 | <i>ETS1</i>                      | <i>BCL2</i>                  | <i>ARHGEF2</i>                   | <i>CXCL2</i>                       | <i>CXCL1</i>                           |
| <i>ETS1</i>                  | <i>F2RL1</i>                     | <i>CCL20</i>                 | <i>BCL2</i>                      | <i>CXCL3</i>                       | <i>CXCL2</i>                           |
| <i>F2RL1</i>                 | <i>F3</i>                        | <i>CD274</i>                 | <i>CCL20</i>                     | <i>CXCL8</i>                       | <i>CXCL3</i>                           |
| <i>F3</i>                    | <i>HAS2</i>                      | <i>DRD1</i>                  | <i>CD274</i>                     | <i>EDN2</i>                        | <i>CXCL8</i>                           |
| <i>HAS2</i>                  | <i>HBEGF</i>                     | <i>ETS1</i>                  | <i>CXCL12</i>                    | <i>F3</i>                          | <i>EDN2</i>                            |
| <i>HBEGF</i>                 | <i>ITGA2</i>                     | <i>FLT1</i>                  | <i>DRD1</i>                      | <i>GRB7</i>                        | <i>ENPP2</i>                           |
| <i>IL1B</i>                  | <i>PLPP3</i>                     | <i>HBEGF</i>                 | <i>ETS1</i>                      | <i>HAS2</i>                        | <i>F3</i>                              |
| <i>ITGA2</i>                 | <i>PTGS2</i>                     | <i>ITGA2</i>                 | <i>HBEGF</i>                     | <i>HBEGF</i>                       | <i>GRB7</i>                            |
| <i>PDGFB</i>                 | <i>SEMA6D</i>                    | <i>NRP1</i>                  | <i>ITGA2</i>                     | <i>HMCN2</i>                       | <i>HAS2</i>                            |
| <i>PLPP3</i>                 | <i>SERPINE1</i>                  | <i>PTAFR</i>                 | <i>LEF1</i>                      | <i>NOS3</i>                        | <i>HBEGF</i>                           |
| <i>PTGS2</i>                 | <i>SPRY2</i>                     | <i>PTGS2</i>                 | <i>MADCAM1</i>                   | <i>RHOB</i>                        | <i>ITGA2</i>                           |
| <i>SEMA6D</i>                | <i>TNFSF14</i>                   | <i>PTK2B</i>                 | <i>NRP1</i>                      | <i>SNAI1</i>                       | <i>JCAD</i>                            |
| <i>SERPINE1</i>              |                                  | <i>SEMA4B</i>                | <i>PTGS2</i>                     | <i>SPRY2</i>                       | <i>NOS3</i>                            |
| <i>SPRY2</i>                 |                                  | <i>SEMA7A</i>                | <i>PTK2B</i>                     | <i>ZC3H12A</i>                     | <i>RHOB</i>                            |
| <i>VEGFC</i>                 |                                  | <i>SERPINE1</i>              | <i>SEMA4B</i>                    |                                    | <i>SNAI1</i>                           |
|                              |                                  | <i>SMURF2</i>                | <i>SERPINE1</i>                  |                                    | <i>SPRY2</i>                           |
|                              |                                  | <i>SPRY2</i>                 | <i>SMURF2</i>                    |                                    |                                        |
|                              |                                  | <i>VEGFD</i>                 | <i>SPRY2</i>                     |                                    |                                        |
|                              |                                  |                              | <i>TERT</i>                      |                                    |                                        |

**Table S20: Regulated genes after afatinib and trastuzumab + afatinib treatment related to the biological function “positive regulation of apoptotic signaling pathway”. In NCI-N87 cells exclusively regulated genes are colored in blue.**

| MKN1 24h Cet vs. MKN1 24h untr | MKN1 24h Afa vs. MKN1 24h untr | MKN1 24h Tra+Afa vs. MKN1 24h untr | MKN7 24h Afa vs. MKN7 24h untr | MKN7 24h Tra+Afa vs. MKN7 24h untr | NCI-N87 24h Afa vs. NCI-N87 24h untr | NCI-N87 24h Tra+Afa vs. NCI-N87 24h untr |
|--------------------------------|--------------------------------|------------------------------------|--------------------------------|------------------------------------|--------------------------------------|------------------------------------------|
| <i>BMF</i>                     | <i>AGT</i>                     | <i>ATF3</i>                        | <i>BCL2</i>                    | <i>BCL2</i>                        | <i>BAX</i>                           | <i>BAX</i>                               |
| <i>TNFSF10</i>                 | <i>ATF3</i>                    | <i>BCL2</i>                        | <i>BCL2L1</i>                  | <i>BCL2L1</i>                      | <i>BBC3</i>                          | <i>BBC3</i>                              |
|                                | <i>BCL2</i>                    | <i>BMF</i>                         | <i>BID</i>                     | <i>BID</i>                         | <i>BCL2</i>                          | <i>BCL2</i>                              |
|                                | <i>BMF</i>                     | <i>TNFRSF12A</i>                   | <i>CTSC</i>                    | <i>CTSC</i>                        | <i>BCL2L1</i>                        | <i>BCL2L1</i>                            |
|                                | <i>TNFSF10</i>                 | <i>TNFSF10</i>                     | <i>FAM162A</i>                 | <i>FAM162A</i>                     | <i>BCLAF1</i>                        | <i>BCLAF1</i>                            |
|                                |                                |                                    | <i>HRK</i>                     | <i>HRK</i>                         | <i>BID</i>                           | <i>BID</i>                               |
|                                |                                |                                    | <i>MMP9</i>                    | <i>MMP9</i>                        | <i>BMF</i>                           | <i>BMF</i>                               |
|                                |                                |                                    | <i>PLA2G6</i>                  | <i>NOX1</i>                        | <i>CAV1</i>                          | <i>CAV1</i>                              |
|                                |                                |                                    | <i>PLAUR</i>                   | <i>PLA2G6</i>                      | <i>CTSC</i>                          | <i>CTSC</i>                              |
|                                |                                |                                    | <i>S100A9</i>                  | <i>PLAUR</i>                       | <i>E2F1</i>                          | <i>DYNLL1</i>                            |
|                                |                                |                                    | <i>SFRP1</i>                   | <i>PMAIP1</i>                      | <i>FADD</i>                          | <i>DYNLL2</i>                            |
|                                |                                |                                    | <i>TFAP4</i>                   | <i>S100A9</i>                      | <i>FAF1</i>                          | <i>E2F1</i>                              |
|                                |                                |                                    | <i>TFDP1</i>                   | <i>SFRP1</i>                       | <i>FAS</i>                           | <i>FADD</i>                              |
|                                |                                |                                    | <i>TNFRSF10A</i>               | <i>TFAP4</i>                       | <i>GSN</i>                           | <i>FAF1</i>                              |
|                                |                                |                                    | <i>TNFRSF10B</i>               | <i>TFDP1</i>                       | <i>HYAL2</i>                         | <i>FAM162A</i>                           |
|                                |                                |                                    |                                | <i>TNFRSF10A</i>                   | <i>IL19</i>                          | <i>FAS</i>                               |
|                                |                                |                                    |                                | <i>TNFRSF10B</i>                   | <i>IL20RA</i>                        | <i>GSK3A</i>                             |
|                                |                                |                                    |                                |                                    | <i>INHBB</i>                         | <i>GSN</i>                               |
|                                |                                |                                    |                                |                                    | <i>LCK</i>                           | <i>HYAL2</i>                             |
|                                |                                |                                    |                                |                                    | <i>LGALS9</i>                        | <i>IFNB1</i>                             |
|                                |                                |                                    |                                |                                    | <i>MMP9</i>                          | <i>IL19</i>                              |
|                                |                                |                                    |                                |                                    | <i>NACC2</i>                         | <i>IL20RA</i>                            |
|                                |                                |                                    |                                |                                    | <i>NF1</i>                           | <i>INHBB</i>                             |
|                                |                                |                                    |                                |                                    | <i>NFATC4</i>                        | <i>LCK</i>                               |
|                                |                                |                                    |                                |                                    | <i>NKX3-1</i>                        | <i>LGALS9</i>                            |
|                                |                                |                                    |                                |                                    | <i>PAK2</i>                          | <i>LTBR</i>                              |
|                                |                                |                                    |                                |                                    | <i>PARK7</i>                         | <i>MAL</i>                               |
|                                |                                |                                    |                                |                                    | <i>PDCD5</i>                         | <i>NACC2</i>                             |
|                                |                                |                                    |                                |                                    | <i>PDIA3</i>                         | <i>NF1</i>                               |
|                                |                                |                                    |                                |                                    | <i>PEA15</i>                         | <i>NFATC4</i>                            |
|                                |                                |                                    |                                |                                    | <i>PINK1</i>                         | <i>NKX3-1</i>                            |
|                                |                                |                                    |                                |                                    | <i>PLA2G6</i>                        | <i>NMT1</i>                              |
|                                |                                |                                    |                                |                                    | <i>PLAUR</i>                         | <i>NOX1</i>                              |
|                                |                                |                                    |                                |                                    | <i>PMAIP1</i>                        | <i>PAK2</i>                              |
|                                |                                |                                    |                                |                                    | <i>PPIF</i>                          | <i>PARK7</i>                             |
|                                |                                |                                    |                                |                                    | <i>PPP2R1B</i>                       | <i>PDCD5</i>                             |
|                                |                                |                                    |                                |                                    | <i>PPP3CC</i>                        | <i>PDIA3</i>                             |
|                                |                                |                                    |                                |                                    | <i>PRKRA</i>                         | <i>PEA15</i>                             |
|                                |                                |                                    |                                |                                    | <i>RIPK3</i>                         | <i>PLA2G6</i>                            |

|  |                  |                  |
|--|------------------|------------------|
|  | <i>SFN</i>       | <i>PLAUR</i>     |
|  | <i>SFPQ</i>      | <i>PMAIP1</i>    |
|  | <i>SKIL</i>      | <i>PPIF</i>      |
|  | <i>SLC9A3R1</i>  | <i>PPP1CA</i>    |
|  | <i>SMAD3</i>     | <i>PPP2R1B</i>   |
|  | <i>STK4</i>      | <i>PPP3CC</i>    |
|  | <i>TFAP4</i>     | <i>PRKRA</i>     |
|  | <i>TFDP1</i>     | <i>S100A9</i>    |
|  | <i>TGFBR1</i>    | <i>SFN</i>       |
|  | <i>TNFRSF10A</i> | <i>SFPQ</i>      |
|  | <i>TNFRSF10B</i> | <i>SIRT1</i>     |
|  | <i>TNFRSF12A</i> | <i>SKIL</i>      |
|  | <i>TNFSF10</i>   | <i>SLC9A3R1</i>  |
|  | <i>TP73</i>      | <i>SMAD3</i>     |
|  | <i>TPD52L1</i>   | <i>STK4</i>      |
|  | <i>WDR35</i>     | <i>TFAP4</i>     |
|  | <i>YWHAB</i>     | <i>TFDP1</i>     |
|  | <i>YWHAE</i>     | <i>TGFBR1</i>    |
|  | <i>YWHAG</i>     | <i>TNFRSF10A</i> |
|  | <i>YWHAH</i>     | <i>TNFRSF10B</i> |
|  | <i>YWHAQ</i>     | <i>TNFRSF12A</i> |
|  | <i>YWHAZ</i>     | <i>TNFSF10</i>   |
|  | <i>ZNF205</i>    | <i>TP63</i>      |
|  |                  | <i>TP73</i>      |
|  |                  | <i>TPD52L1</i>   |
|  |                  | <i>WDR35</i>     |
|  |                  | <i>YWHAB</i>     |
|  |                  | <i>YWHAE</i>     |
|  |                  | <i>YWHAG</i>     |
|  |                  | <i>YWHAH</i>     |
|  |                  | <i>YWHAQ</i>     |
|  |                  | <i>YWHAZ</i>     |
|  |                  | <i>ZNF205</i>    |
