# Supplementary material for: Determining the effects of trastuzumab, cetuximab and afatinib by phosphoprotein, gene expression and phenotypic analysis in gastric cancer cell lines
Source: PubMed Central journal article supplement (PMC7594334; doi:10.1186/s12885-020-07540-7), 2020-10-28
Supplement: 12885_2020_7540_MOESM5_ESM.pdf [file 12885_2020_7540_MOESM5_ESM.pdf]

# Experiment 1

## Supplemental full-length blots corresponding to Figure 8

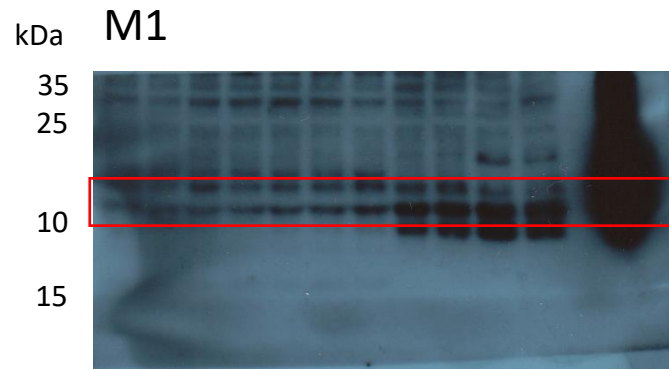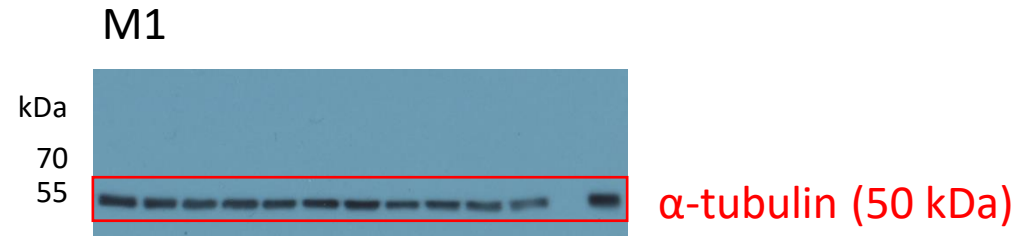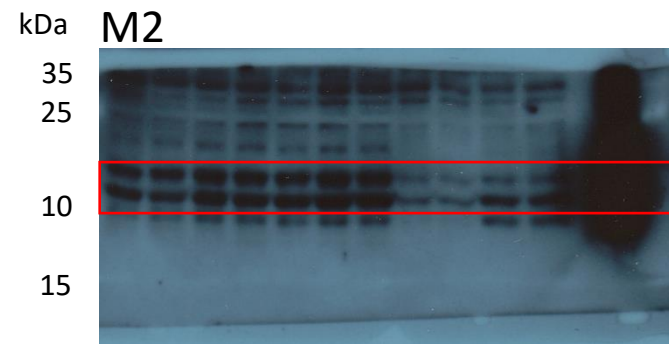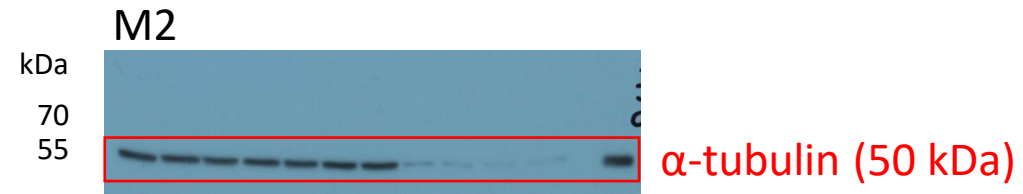

Membranes were cut before staining

# Experiment 2

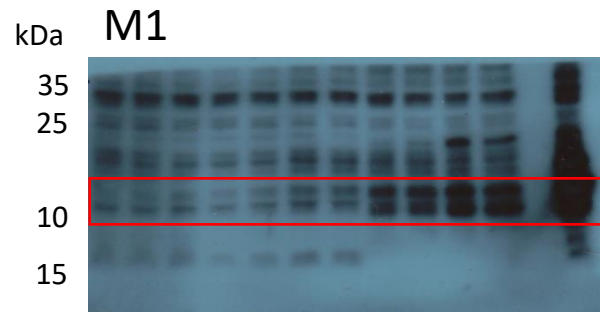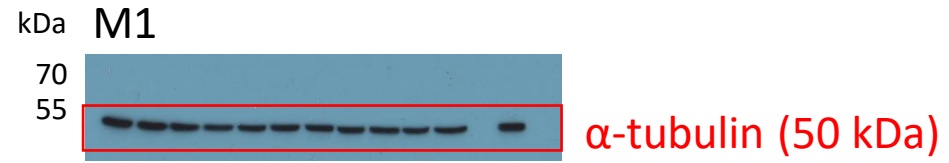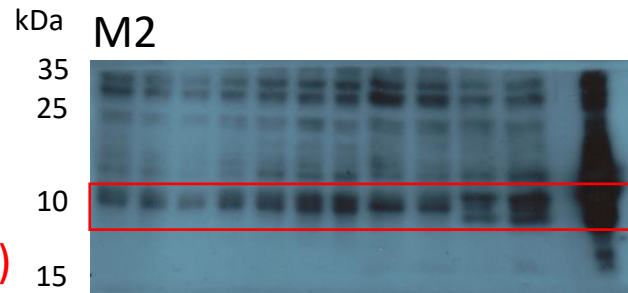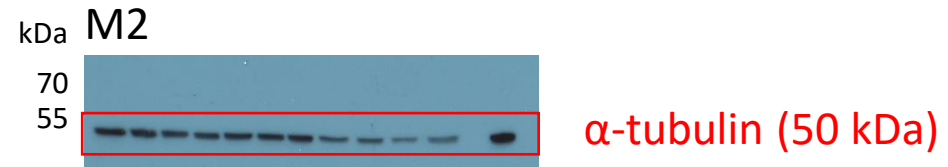

Membranes were cut before staining

# Experiment 3

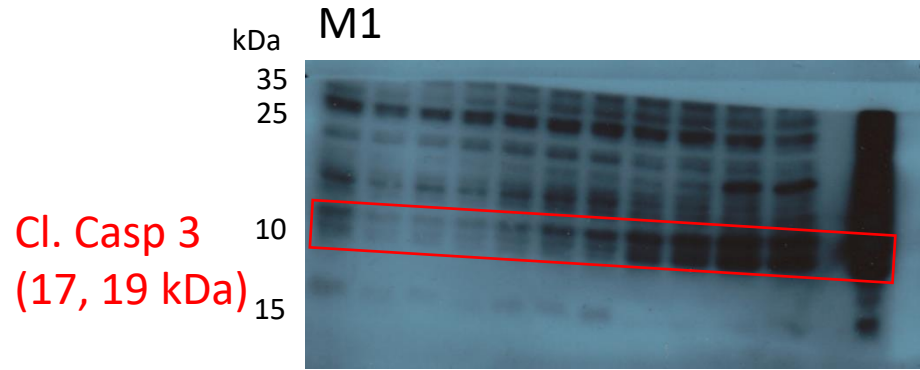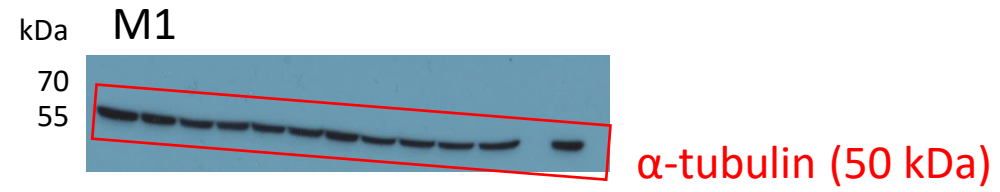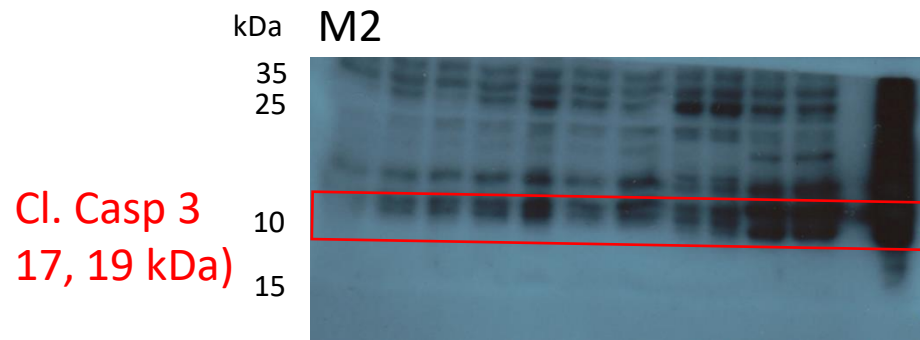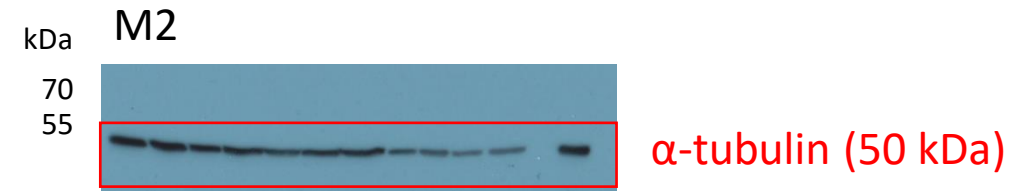

Membranes were cut before staining

## M1

| 1 | 2            | 3           | 4           | 5               | 6           | 7           | 8               | 9            | 10          | 11          | 12             | 13 | 14                         | 15 |
|---|--------------|-------------|-------------|-----------------|-------------|-------------|-----------------|--------------|-------------|-------------|----------------|----|----------------------------|----|
| L | MKN1<br>untr | MKN1<br>EGF | MKN1<br>Cet | MKN1<br>EGF+Cet | MKN1<br>Tra | MKN1<br>Afa | MKN1<br>Tra+Afa | MKN7<br>untr | MKN7<br>Tra | MKN7<br>Afa | MKN7<br>TraAfa |    | Jurkat<br>Cytochro<br>me c | L  |

## M2

| 1 | 2              | 3             | 4             | 5                 | 6             | 7             | 8                 | 9           | 10         | 11         | 12             | 13 | 14                         | 15 |
|---|----------------|---------------|---------------|-------------------|---------------|---------------|-------------------|-------------|------------|------------|----------------|----|----------------------------|----|
| L | Hs746T<br>untr | Hs746T<br>EGF | Hs746T<br>Cet | Hs746T<br>EGF+Cet | Hs746T<br>Tra | Hs746T<br>Afa | Hs746T<br>Tra+Afa | N87<br>untr | N87<br>Tra | N87<br>Afa | N87<br>Tra+Afa |    | Jurkat<br>Cytochro<br>me c | L  |

Jurkat cell extracts in treated with Cytochrome c in vitro were used as positive control (Cell Signaling #9663S)
