# Supplementary material for: Determining the effects of trastuzumab, cetuximab and afatinib by phosphoprotein, gene expression and phenotypic analysis in gastric cancer cell lines
Source: PubMed Central journal article supplement (PMC7594334; doi:10.1186/s12885-020-07540-7), 2020-10-28

Experiment 1

Supplemental full-length blots corresponding to Additional File 2, Figure S3

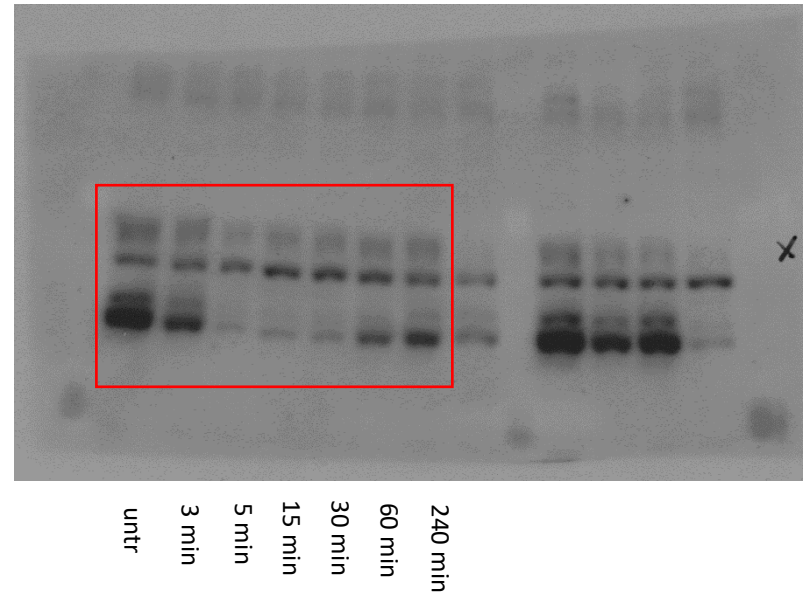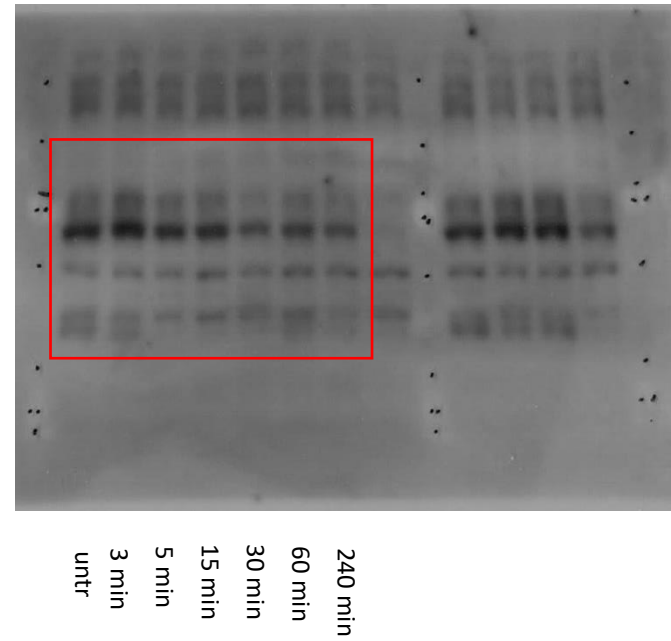

# Experiment 2

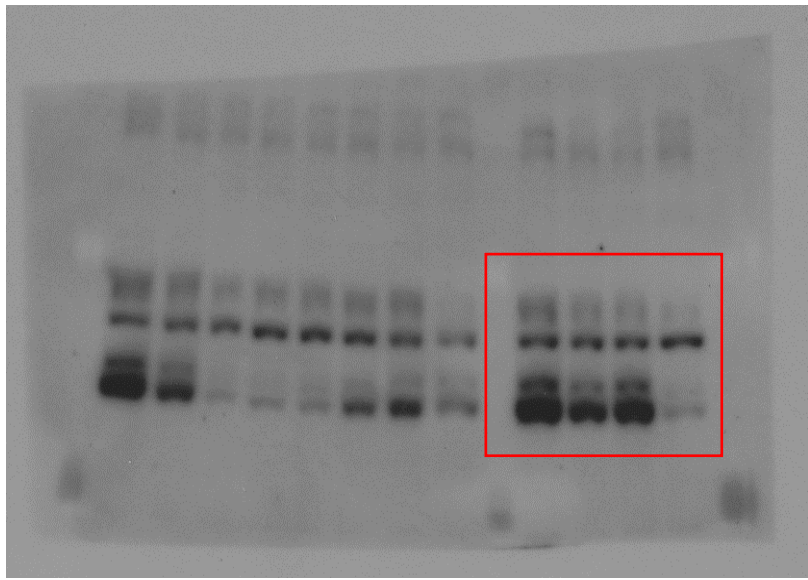

15 min  
5 min  
3 min  
untr

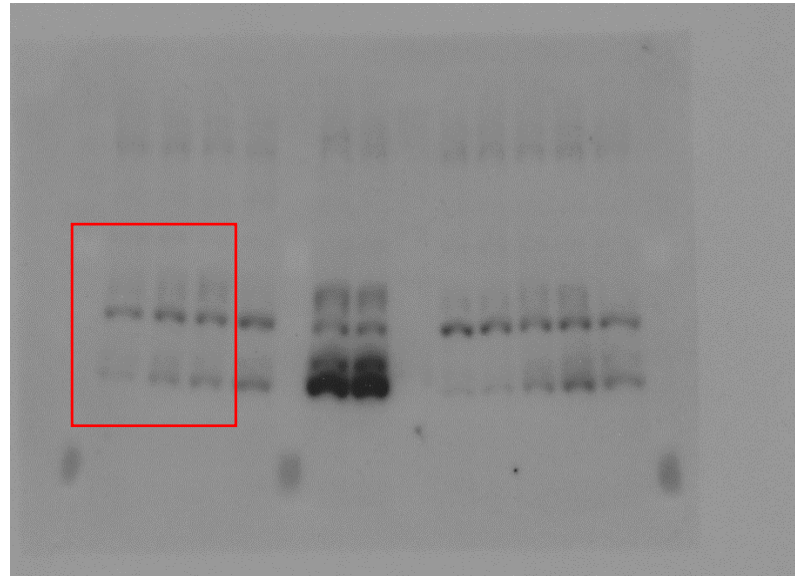

240 min  
60 min  
30 min

pAKT1 (60 kDa)  
 $\alpha$ -tubulin (50 kDa)  
pMAPK3 (44 kDa)

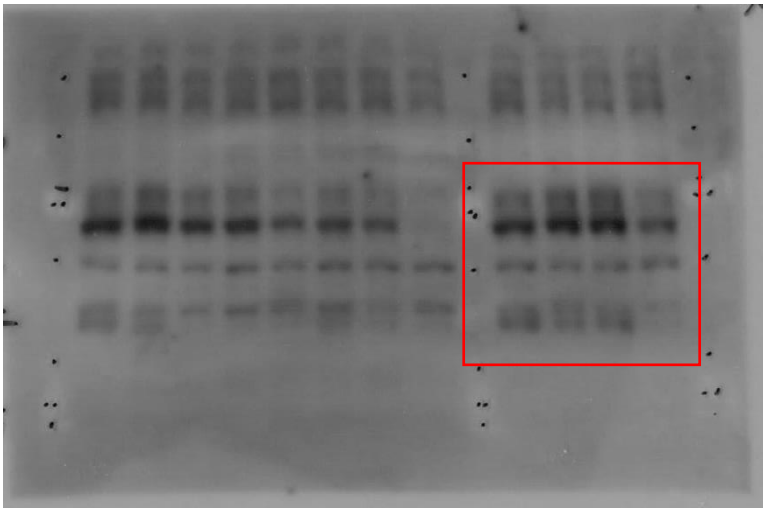

15 min  
5 min  
3 min  
untr

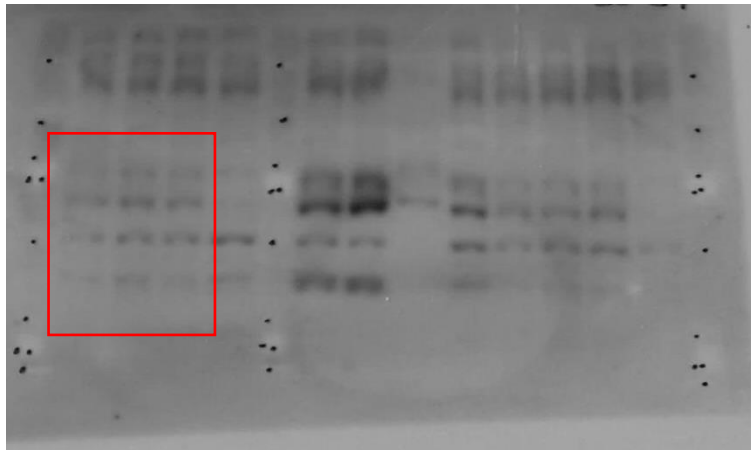

240 min  
60 min  
30 min

pp70S6K (70, 85 kDa)  
 $\alpha$ -tubulin (50 kDa)  
pMEK1 (45 kDa)

# Experiment 3

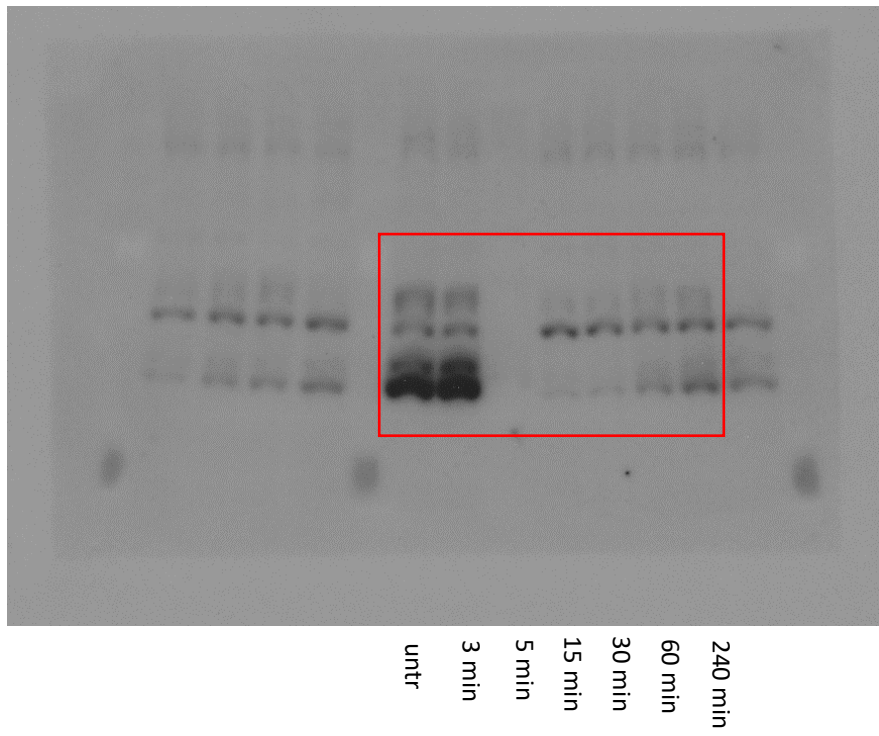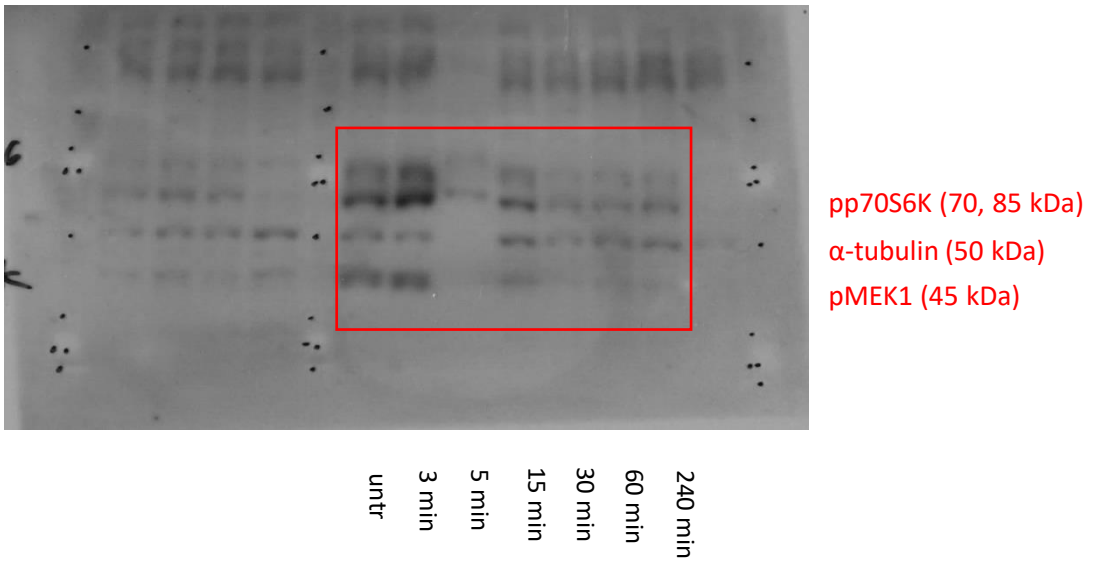

Supplement: 12885_2020_7540_MOESM6_ESM.pdf [file 12885_2020_7540_MOESM6_ESM.pdf]
